# Supplementary material for: An aging‐related signature predicts favorable outcome and immunogenicity in lung adenocarcinoma
Source: PubMed Central journal article supplement — Cancer Sci. 2022 Jan 7;113(3):891–903. doi: 10.1111/cas.15254 (PMC8898732; doi:10.1111/cas.15254), 2022-01-07
Supplement: CAS-113-891-s001.pdf [file CAS-113-891-s001.pdf]

## Supplementary Tables

**Table S1 Summary of TCGA and 11 validation LUAD datasets included in this study**

| Datasets | Platforms                                                 | Sample size |
|----------|-----------------------------------------------------------|-------------|
| TCGA     | Illumina RNAseq HTSeq                                     | 499         |
| GSE72094 | Rosetta/Merck Human RSTA Custom Affymetrix 2.0 microarray | 398         |
| GSE68465 | Affymetrix Human Genome U133A Array                       | 442         |
| GSE50081 | Affymetrix Human Genome U133 Plus 2.0 Array               | 127         |
| GSE42127 | Illumina HumanWG-6 v3.0 expression beadchip               | 132         |
| GSE41271 | Illumina HumanWG-6 v3.0 expression beadchip               | 181         |
| GSE31210 | Affymetrix Human Genome U133 Plus 2.0 Array               | 226         |
| GSE30219 | Affymetrix Human Genome U133 Plus 2.0 Array               | 85          |
| GSE13213 | Agilent-014850 Whole Human Genome Microarray 4x44K G4112F | 117         |
| GSE26939 | Agilent-UNC-custom-4X44K                                  | 115         |
| GSE11969 | Agilent Homo sapiens 21.6K custom array                   | 90          |
| GSE81089 | Illumina HiSeq 2500                                       | 106         |
| Total    |                                                           | 2518        |

**Table S2 Feature genes for 28 immunocyte subtypes**

| Immunocyte subtype             | Genes                                                                                                                                                                                                                                                                                              |
|--------------------------------|----------------------------------------------------------------------------------------------------------------------------------------------------------------------------------------------------------------------------------------------------------------------------------------------------|
| Activated CD4 T cell           | AIM2, BIRC3, BRIP1, CCL20, CCL4, CCL5, CCNB1, CCR7, DUSP2, ESCO2, ETS1, EXO1, EXOC6, IARS, ITK, KIF11, KNTC1, NUF2, PRC1, PSAT1, RGS1, RTKN2, SAMSN1, SELL, TRAT1                                                                                                                                  |
| Activated CD8 T cell           | ADRM1, AHSA1, C1GALT1C1, CCT6B, CD37, CD3D, CD3E, CD3G, CD69, CD8A, CETN3, CSE1L, GEMIN6, GNLY, GPT2, GZMA, GZMH, GZMK, IL2RB, LCK, MPZL1, NKG7, PIK3IP1, PTRH2, TIMM13, ZAP70                                                                                                                     |
| Activated dendritic cell       | ABCD1, C1QC, CAPG, CCL3L3, CD207, CD302, ATP5B, ATP5L, ATP6V1A, BCL2L1, C1QB, SNURF, SPCS3, CCNA1, CEACAM8, NOS2, SRA1, TNFRSF6B, TREM1, TREML1, RHOA, SLC25A37, TNFSF14, TREML4, VNN2, XPO6, CLEC4C, TNFAIP2, UBD, ACTR3, RAB1A, SLA, HLA-DQA2, SIGLEC5, SLAMF9                                   |
| CD56bright natural killer cell | ABAT, C11orf75, C5orf15, CDHR1, DCAF12, DYNLL1, GPR137B, HCP5, HDGFRP2, KRT86, MLST8, ELMOD3, ENTPD5, FAM119A, FAM179A, CLIC2, COX7A2L, CREB3L4, CSF1, CSNK2A2, CSTA, CSTB, CTPS, CTSD, FST, GATA2, GMPR, HDC, HEY1, HOXA1, HS2ST1, HS3ST1, BCL11B, CDH3, MYL6B, NAA16, CIQA, CIQB, CYP27B1, EIF3M |
| Central memory CD4 T cell      | ABHD3, AHNAK, ANXA2P2, AQP3, ATHL1, BMI1, BZW2, CD63, COL4A1, CYLD, ELMO2, FYN, GLIPR1, GSS, IFITM2, ITGB1, ITGB2, KLF5, LSP1, NDUFB9, PKM2,                                                                                                                                                       |

|                             |                                                                                                                                                                                                                                                                                                                                                                                                                                                                                                                                                          |
|-----------------------------|----------------------------------------------------------------------------------------------------------------------------------------------------------------------------------------------------------------------------------------------------------------------------------------------------------------------------------------------------------------------------------------------------------------------------------------------------------------------------------------------------------------------------------------------------------|
|                             | SFXN3, SIRPG, SMAD4, STX4, TRADD, VIM, XRCC6                                                                                                                                                                                                                                                                                                                                                                                                                                                                                                             |
| Central memory CD8 T cell   | ACTN4, ADAM12, ADCY9, F13A1, FCER1G, FCGR3B, FGF7, FKBP4, GLUD1, GM2A, GUSB, IL1RN, NOL11, NTRK1, RARA, RNF128, SIGLEC1, TNFRSF11A, TOX4, UBA52, ULBP1                                                                                                                                                                                                                                                                                                                                                                                                   |
| Effector memory CD4 T cell  | ATM, CASP3, CASQ1, CD300E, DARS, DOCK9, EXOSC9, EZH2, GDE1, IL34, NCOA4, NEFL, PDGFRL, PTGS1, REPS1, SCG2, SDPR, SIGLEC14, SIGLEC6, TAL1, TFEC, TIPIN, TPK1, UQCRB, USP9Y, WIPF1, ZCRB1                                                                                                                                                                                                                                                                                                                                                                  |
| Effector memory CD8 T cell  | ACAP1, APOL3, ARHGAP10, ATP10D, C3AR1, CCR5, CD160, CD55, CFLAR, CMKLR1, DAPP1, FCRL6, FLT3LG, GZMM, HAPLN3, HLA-DMB, HLA-DPA1, HLA-DPB1, IFI16, LIME1, LTK, NFKBIA, SETD7, SIK1, TRIB2                                                                                                                                                                                                                                                                                                                                                                  |
| Natural killer cell         | AKT3, AXL, BST2, CDH2, CRTAM, CSF2RA, CTSZ, CXCL1, CYTH1, DAXX, DGKH, DLL4, DPYD, ERBB3, F11R, FAM27A, FAM49A, FASLG, FCGR1A, FN1, FSTL1, FUCA1, GBP3, GLS2, GRB2, LST1, BCL2, CDC5L, FGF18, FUT5, FZR1, GAGE2, IGFBP5, KANK2, LDB3                                                                                                                                                                                                                                                                                                                      |
| Natural killer T cell       | BTN2A2, CD101, CD109, CNPY3, CNPY4, CREB1, CRTC2, CRTC3, CSF2, KLRC1, FUT4, ICAM2, IL32, LAMP2, LILRB5, KLRG1, HSPA4, HSPB6, ISM2, ITIH2, KDM4C, KIR2DS4, KIRREL3, SDCBP, NFATC2IP, MICB, KIR2DL1, KIR2DL3, KIR3DL1, KIR3DL2, NCR1, FOSL1, TSLP, SLC7A7, SPP1, TREM2, UBASH3A, YBX2, CCDC88A, CLEC1A, THBD, PDPN, VCAM1, EMR1                                                                                                                                                                                                                            |
| Type 1 T helper cell        | CD70, TBX21, ADAM8, AHCYL2, ALCAM, B3GALNT1, BBS12, BST1, CD151, CD47, CD48, CD52, CD53, CD59, CD6, CD68, CD7, CD96, CFHR3, CHRM3, CLEC7A, COL23A1, COL4A4, COL5A3, DAB1, DLEU7, DOC2B, EMP1, F12, FURIN, GAB3, GATM, GFPT2, GPR25, GREM2, HAVCR1, HSD11B1, HUNK, IGF2, RCSD1, RYR1, SAV1, SELE, SELP, SH3KBP1, SIT1, SLC35B3, SIGLEC10, SKAP1, THUMPD2, TIGIT, ZEB2, ENC1, FAM134B, FBXO30, FCGR2C, STAC, LTC4S, MAN1B1, MDH1, MMD, RGS16, IL12A, P2RX5, CD97, ITGB4, ICAM3, METRNL, TNFRSF1A, IRF1, HTR2B, CALD1, MOCOS, TRAF3IP2, TLR8, TRAF1, DUSP14 |
| Type 17 T helper cell       | IL17A, IL17RA, C2CD4A, C2CD4B, CA2, CCDC65, CEACAM3, IL17C, IL17F, IL17RC, IL17RE, IL23A, ILDR1, LONRF3, SH2D6, TNIP2, ABCA1, ABCB1, ADAMTS12, ANK1, ANKRD22, B3GALT2, CAMTA1, CCR9, CD40, GPR44, IFT80                                                                                                                                                                                                                                                                                                                                                  |
| CD56dim natural killer cell | CYP27A1, DDX55, DYRK2, RPL37A, NOTCH3, AKR7A3, GPRC5C, GRIN1, HLA-E, PORCN, PSMC4, UPP1, IL21R,                                                                                                                                                                                                                                                                                                                                                                                                                                                          |

|                             |                                                                                                                                                                                                                                  |
|-----------------------------|----------------------------------------------------------------------------------------------------------------------------------------------------------------------------------------------------------------------------------|
|                             | KIR2DS1, KIR2DS2, KIR2DS5                                                                                                                                                                                                        |
| Immature dendritic cell     | ACADM, AHCYL1, ALDH1A2, ALDH3A2, ALDH9A1, ALOX15, AMT, ARL1, ATIC, ATP5A1, CAPZA1, LILRA5, RDX, RRAGD, TACSTD2, INPP5F, RAB38, PLAU, CSF3R, SLC18A2, AMPD2, CLTB, C1orf162                                                       |
| Macrophage                  | AIF1, CCL1, CCL14, CCL23, CCL26, CD300LB, CNR1, CNR2, EIF1, EIF4A1, FPR1, FPR2, FRAT2, GPR27, GPR77, RNASE2, MS4A2, BASP1, IGSF6, HK3, VNN1, FES, NPL, FZD2, FAM198B, HNMT, SLC15A3, CD4, TXNDC3, FRMD4A, CRYBB1, HRH1, WNT5B    |
| MDSC                        | CCR2, CD14, CD2, CD86, CXCR4, FCGR2A, FCGR2B, FCGR3A, FERMT3, GPSM3, IL18BP, IL4R, ITGAL, ITGAM, PARVG, PSAP, PTGER2, PTGES2, S100A8, S100A9                                                                                     |
| Neutrophil                  | CREB5, CDA, CHST15, S100A12, APOBEC3A, CASP5, MMP25, HAL, C1orf183, FFAR2, MAK, CXCR1, STEAP4, MGAM, BTNL8, CXCR2, TNFRSF10C, VNN3                                                                                               |
| Plasmacytoid dendritic cell | CBX6, DAB2, DDX17, HIGD1A, IDH3A, IL3RA, MAGED1, NUCB2, OFD1, OGT, PDIA4, SERTAD2, SIRPA, TMED2, ENG, FCAR, IGF1, ITGA2B, GABARAP, GPX1, KRT23, PROK2, RALB, RETNLB, RNF141, SEC14L1, SEPX1, EMP3, CD300LF, ABTB1, KLHL21, PHRF1 |
| Regulatory T cell           | CCL3L1, CD72, CLEC5A, FOXP3, ITGA4, L1CAM, LIPA, LRP1, LRRC42, MARCO, MMP12, MNDA, MRC1, MS4A6A, PELO, PLEK, PRSS23, PTGIR, ST8SIA4, STAB1                                                                                       |
| Type 2 T helper cell        | ASB2, CSRP2, DAPK1, DLC1, DNAJC12, DUSP6, GNAI1, LAMP3, NRP2, OSBPL1A, PDE4B, PHLDA1, PLA2G4A, RAB27B, RBMS3, RNF125, TMPRSS3, GATA3, BIRC5, CDC25C, CDC7, CENPF, CXCR6, DHFR, EVI5, GSTA4, HELLS, IL26, LAIR2                   |
| Activated B cell            | ADAM28, CD180, CD79B, BLK, CD19, MS4A1, TNFRSF17, IGHM, GNG7, MICAL3, SPIB, HLA-DOB, IGKC, PNOC, FCRL2, BACH2, CR2, TCL1A, AKNA, ARHGAP25, CCL21, CD27, CD38, CLEC17A, CLEC9A, CLECL1                                            |
| Eosinophil                  | GIPR, KRT18P50, LRMP, FOSB, RRP12, GPR183, NR4A3, ST3GAL6, DEPDC5, PDE6C, PKD2L2, GPR65, IL5RA, P2RY14, DACH1, DAPK2, EMR3                                                                                                       |
| Gamma delta T cell          | ACP5, AQP9, BTN3A2, C1orf54, CARD8, CCL18, CD209, CD33, CD36, CDK5, IL10RB, KLRF1, LGALS1, MAPK7, KLHL7, KRT80, LAMC1, LCORL, LMNB1, MEIS3P1, MPL, FABP1, FABP5, FADD, MFAP3L, MINPP1, RPS24, RPS7, RPS9, DBNL, CCL13            |
| Immature B cell             | CD22, CYBB, FAM129C, FCRL1, FCRL3, FCRL5, FCRLA, HDAC9, HLA-DQA1, HVCN1, KIAA0226, NCF1, NCF1B, P2RY10, SP100, TXNIP, STAP1, TAGAP, ZCCHC2                                                                                       |

|                          |                                                                                                                                                                                                                                                                  |
|--------------------------|------------------------------------------------------------------------------------------------------------------------------------------------------------------------------------------------------------------------------------------------------------------|
| Mast cell                | ADAMTS3, CPA3, CMA1, CTSG, ARHGAP15, CPM, FCN1, FTL, HSPA6, ITGA9, RNASE3, S100A4, SIGLEC8, SLC6A4, PTGS2, EGR3, PILRA                                                                                                                                           |
| Memory B cell            | AICDA, CCNA2, CDKN3, CLCN5, ENPP1, FCER1A, FCRL4, MYC, RUNX2, SORL1, SOX5, STAT5A, STAT5B, TLR9                                                                                                                                                                  |
| Monocyte                 | ASGR2, CFP, ASGR1, CD1D, UPK3A, ACTG1, ANXA5, ATP6V1B2, CFL1, DAZAP2, CTBS, EMR4P, HIVEP2, MARCKSL1, MBP, MMP15, PNPLA6, TMBIM6, PQBP1, TEX264, IKZF1                                                                                                            |
| T follicular helper cell | B3GAT1, CDK5R1, PDCD1, BCL6, CD200, CD83, CD84, FGF2, GPR18, CEBPA, CECR1, CLEC10A, CLEC4A, CSF1R, CTSS, DMN, DPP4, LRRC32, MC5R, MICA, NCAM1, NCR2, NRP1, PDCD1LG2, PDCD6, PRDX1, RAE1, RAET1E, SIGLEC7, SIGLEC9, TYRO3, CHST12, CLIC3, IVNS1ABP, KIR2DL2, LGMN |

**Table S3 Specific feature genes for six representative immune-related signatures**

| Immune signatures         | Genes                                                                                                                                                                                                                                                                                                                                                                                                                                                                                                                                                                                                                                                                                                                                                                                                                                                                                                                                                                                                            |
|---------------------------|------------------------------------------------------------------------------------------------------------------------------------------------------------------------------------------------------------------------------------------------------------------------------------------------------------------------------------------------------------------------------------------------------------------------------------------------------------------------------------------------------------------------------------------------------------------------------------------------------------------------------------------------------------------------------------------------------------------------------------------------------------------------------------------------------------------------------------------------------------------------------------------------------------------------------------------------------------------------------------------------------------------|
| Cytolytic activity        | GZMA, PRF1                                                                                                                                                                                                                                                                                                                                                                                                                                                                                                                                                                                                                                                                                                                                                                                                                                                                                                                                                                                                       |
| T cell inflamed signature | CD274, CD276, CCL5, CD27, CD8A, CMKLR1, CXCL9, CXCR6, IDO1, LAG3, NKG7, PDCD1LG2, PSMB10, HLA-DQA1, HLA-DRB1, HLA-E, STAT1, TIGIT                                                                                                                                                                                                                                                                                                                                                                                                                                                                                                                                                                                                                                                                                                                                                                                                                                                                                |
| Immune cells signature    | LCP2, LSP1, FYB, PLEK, HCK, IL10RA, LILRB1, NCKAP1L, LAIR1, NCF2, CYBB, PTPRC, IL7R, LAPTM5, CD53, EVI2B, SLA, ITGB2, GIMAP4, MYO1F, HCLS1, MNDA, IL2RG, CD48, AOA, CCL5, LTB, GMFG, GIMAP6, GZMK, LST1, GPR65, LILRB2, WIPF1, CD37, BIN2, FCER1G, IKZF1, TYROBP, FGL2, FLI1, IRF8, ARHGAP15, SH2B3, TNFRSF1B, DOCK2, CD2, ARHGEF6, CORO1A, LY96, LYZ, ITGAL, TNFAIP3, RNASE6, TGFB1, PSTPIP1, CST7, RGS1, FGR, SELL, MICAL1, TRAF3IP3, ITGA4, MAFB, ARHGDIB, IL4R, RHOH, HLA-DPA1, NKG7, NCF4, LPXN, ITK, SELPLG, HLA-DPB1, CD3D, CD300A, IL2RB, ADCY7, PTGER4, SRGN, CD247, CCR7, MSN, ALOX5AP, PTGER2, RAC2, GBP2, VAV1, CLEC2B, P2RY14, NFKBIA, S100A9, IFI30, MFSD1, RASSF2, TPP1, RHOG, CLEC4A, GZMB, PVRIG, S100A8, CASP1, BCL2A1, HLA-E, KLRB1, GNLY, RAB27A, IL18RAP, TPST2, EMP3, GMIP, LCK, IL32, PTPRCAP, LGALS9, CCDC69, SAMHD1, TAP1, GBP1, CTSS, GZMH, ADAM8, GLRX, PRF1, CD69, HLA-B, HLA-DMA, CD74, KLRK1, PTPRE, HLA-DRA, VNN2, TCIRG1, RABGAP1L, CSTA, ZAP70, HLA-F, HLA-G, CD52, CD302, CD27 |
| Immune cell               | CD1C, CD2, CD3E, CD3D, CD3G, CD6, CD7, CD8A, CD8B,                                                                                                                                                                                                                                                                                                                                                                                                                                                                                                                                                                                                                                                                                                                                                                                                                                                                                                                                                               |

|                            |                                                                                                                                                                                                                                                                                                                                                                                  |
|----------------------------|----------------------------------------------------------------------------------------------------------------------------------------------------------------------------------------------------------------------------------------------------------------------------------------------------------------------------------------------------------------------------------|
| subsets                    | CD19, CD20, NKG7, KLRD1, KLRC1, KIR2DL4, CD24, CD38                                                                                                                                                                                                                                                                                                                              |
| Immune signaling molecules | SH2D1A, TIGIT, PTPRCAP, LAX1, SPIB, SLAMF1, TCL1A, TRAT1, THEMIS, LCK, SIT1, HSH2D, ITK, PTPRC, ZAP70, CRTAM, TIMD4, SIRPG, SLA2, DC247, TBX21, RHOH, HSH2D, TBET, POU2AF1, BLK, PAX5, BANK1, STAP1, IKZF3, TNFRSF17, MS4A1, SPIB, AIM2, SKAP1, IFI27, NLRP2, ZBP1, TIBAB, GZMA, CHIT1, MMP12, HAMP, ERAP2, MARCO, GBP5, SLAMF6, KLRK1, LILRA4, SLAMF7, CHI3L1, GZMB, GZMH, GZMK |
| Cytokines chemokines       | IFNG, FDCSP, CXCL9, CXCL10, CXCL11, CXCL13, CCL21, CCL19, CCL7, XCL1, XCL2, CCR4, CXCR5, CXCR3, DARC, IL7R, IL21R, IL22RA2                                                                                                                                                                                                                                                       |

**Table S4 Results of univariate Cox regression analysis of 1433 aging-related genes in the TCGA LUAD cohort**

| Gene symbol | Univariate P values |
|-------------|---------------------|
| PLEKHB1     | 0.00000624          |
| LINGO2      | 0.00000878          |
| GNG7        | 0.0000135           |
| C1QTNF6     | 0.0000188           |
| MS4A1       | 0.0000435           |
| VIPR1       | 0.000128346         |
| CCR2        | 0.000147095         |
| FAM129C     | 0.000147911         |
| DAAM2       | 0.00015616          |
| B3GALT2     | 0.000179708         |
| CACNA2D2    | 0.000183106         |
| P2RX1       | 0.00019079          |
| TLR10       | 0.000210988         |
| LY9         | 0.000274904         |
| TNFRSF13B   | 0.000354089         |
| NPC2        | 0.000409174         |
| MAL         | 0.000421795         |
| BLK         | 0.000435058         |
| DSC1        | 0.00054327          |
| TTC16       | 0.000558204         |
| SFTPD       | 0.0005585           |
| KYNU        | 0.000581635         |
| ZNF10       | 0.000590204         |
| USP44       | 0.000591267         |
| DPYSL2      | 0.000591549         |
| ATF7IP2     | 0.000604785         |
| ITGA6       | 0.000610519         |

|            |             |
|------------|-------------|
| CD19       | 0.000620147 |
| TCTA       | 0.000643956 |
| KLRB1      | 0.000667806 |
| IGJ        | 0.000687277 |
| FKBP4      | 0.000823854 |
| CD5        | 0.000837366 |
| FCRLA      | 0.000866259 |
| CR2        | 0.001044116 |
| ARRB1      | 0.001045249 |
| FCRL6      | 0.001070907 |
| CD79A      | 0.001237289 |
| BTLA       | 0.001292849 |
| ADHFE1     | 0.001351122 |
| CD79B      | 0.001416351 |
| PTGDS      | 0.001453168 |
| FAIM3      | 0.00151107  |
| IL1R2      | 0.00156774  |
| GAB3       | 0.001572036 |
| RASGRP2    | 0.001608886 |
| TESPA1     | 0.001663689 |
| ADRB2      | 0.001707073 |
| MOAP1      | 0.001804728 |
| CCR6       | 0.001834608 |
| PTTG1      | 0.00183956  |
| CX3CR1     | 0.002130313 |
| DNASE1L3   | 0.002156849 |
| ARHGAP15   | 0.002285445 |
| MTUS1      | 0.002471276 |
| ZNF101     | 0.002714399 |
| TMEM8B     | 0.002818007 |
| YPEL1      | 0.002842328 |
| CD22       | 0.002856929 |
| PARM1      | 0.002875863 |
| CTSG       | 0.00297405  |
| TCN1       | 0.003004252 |
| ST6GALNAC6 | 0.003131288 |
| ZNF439     | 0.003221424 |
| CCR7       | 0.003232164 |
| TSPYL2     | 0.003328419 |
| PEBP1      | 0.003341407 |
| CCT6A      | 0.003345605 |
| OPN3       | 0.003368409 |
| RCAN2      | 0.003389634 |
| SMARCD3    | 0.003412338 |

|          |             |
|----------|-------------|
| USP4     | 0.003680677 |
| NMUR1    | 0.003697113 |
| ITK      | 0.003740544 |
| CXCR6    | 0.003911085 |
| CLEC2D   | 0.003997374 |
| KLHL6    | 0.004013961 |
| DBP      | 0.004260786 |
| ADCY9    | 0.004293351 |
| ITGAL    | 0.004416385 |
| PTGDR    | 0.004606103 |
| ZNF154   | 0.004787832 |
| TNFRSF17 | 0.004831515 |
| ENPP4    | 0.004899477 |
| ZNF470   | 0.004994507 |
| SPIB     | 0.005037701 |
| POU2AF1  | 0.005221178 |
| IRF8     | 0.005648743 |
| SUSD3    | 0.005908179 |
| PIK3CG   | 0.006224634 |
| MCOLN2   | 0.006508228 |
| AKTIP    | 0.006560923 |
| PPP1R3E  | 0.007064409 |
| NELL2    | 0.007137477 |
| SALL2    | 0.007330019 |
| FAM159A  | 0.007339304 |
| RIPK2    | 0.007383095 |
| TAGAP    | 0.007459373 |
| SLCO4C1  | 0.007469142 |
| TLE2     | 0.007644444 |
| ARSG     | 0.007769271 |
| NEDD9    | 0.007906078 |
| LPAR6    | 0.008039047 |
| PYHIN1   | 0.00811632  |
| RPS6KA1  | 0.008129051 |
| ELOVL6   | 0.008217624 |
| PIK3IP1  | 0.008397116 |
| MAP3K3   | 0.008436606 |
| TCEA3    | 0.008625944 |
| BANK1    | 0.008910869 |
| ZNF671   | 0.009072556 |
| EIF2AK3  | 0.009143768 |
| NME8     | 0.009385979 |
| CD27     | 0.009882405 |
| LPCAT1   | 0.009980538 |

|          |             |
|----------|-------------|
| GPR18    | 0.01002416  |
| PMEPA1   | 0.010604679 |
| AFF3     | 0.010636673 |
| KCNG1    | 0.010637522 |
| PAICS    | 0.011071547 |
| CD37     | 0.011098552 |
| C3orf62  | 0.011118378 |
| ANKRD13A | 0.011297551 |
| HVCN1    | 0.011550954 |
| GIMAP7   | 0.011572941 |
| UBASH3A  | 0.011688442 |
| APOBEC3H | 0.011734011 |
| CPEB3    | 0.011759014 |
| CTSW     | 0.011877576 |
| ITGB1    | 0.01208691  |
| TRIM38   | 0.012233629 |
| C2orf40  | 0.012398045 |
| RORC     | 0.012413037 |
| DSC2     | 0.012744974 |
| SIRT4    | 0.013306534 |
| TOX      | 0.013310896 |
| SLAIN1   | 0.013463557 |
| CD28     | 0.013718603 |
| SNRPN    | 0.014785693 |
| EPHX2    | 0.014787758 |
| IL7R     | 0.01481129  |
| CD3D     | 0.014829874 |
| LTB      | 0.015086154 |
| SORT1    | 0.015164562 |
| TTC39B   | 0.01551703  |
| BCAS4    | 0.01634137  |
| RASSF4   | 0.016505714 |
| VPREB3   | 0.016668114 |
| P2RY10   | 0.016704757 |
| PLCB2    | 0.016769867 |
| ABCA6    | 0.017222033 |
| LCK      | 0.017591097 |
| CYCS     | 0.018169382 |
| CCDC34   | 0.018510172 |
| TP53I3   | 0.018602367 |
| LAT      | 0.018753191 |
| SFXN2    | 0.018909748 |
| MRI1     | 0.019018931 |
| TRAT1    | 0.01924264  |



|         |             |
|---------|-------------|
| C1orf21 | 0.01930535  |
| FCGBP   | 0.01967675  |
| CKAP4   | 0.020145746 |
| ZSCAN18 | 0.020234973 |
| ITPKB   | 0.020239956 |
| BEX2    | 0.020497019 |
| CXCR5   | 0.020742831 |
| SETBP1  | 0.020924808 |
| ID2     | 0.021113668 |
| MTSS1   | 0.021183318 |
| PLAUR   | 0.021612653 |
| SLAMF6  | 0.022449188 |
| ENTPD1  | 0.022458717 |
| MFNG    | 0.022720387 |
| AGMAT   | 0.022781658 |
| FAM153B | 0.022944663 |
| IL10RA  | 0.022977348 |
| GOLM1   | 0.023041477 |
| MAN1C1  | 0.023366239 |
| HNMT    | 0.023779644 |
| ST6GAL1 | 0.024049014 |
| RIPK3   | 0.024115651 |
| CYB5A   | 0.024507188 |
| CD96    | 0.024674005 |
| TLL3    | 0.026002989 |
| HSPD1   | 0.026240596 |
| SESN1   | 0.026805797 |
| LPGAT1  | 0.027140016 |
| TMX4    | 0.027426429 |
| CPA5    | 0.027625403 |
| TRIM28  | 0.028272386 |
| PTPN7   | 0.028468915 |
| AXIN2   | 0.02883401  |
| RBL2    | 0.02902046  |
| S100A10 | 0.029380511 |
| MAGEE1  | 0.029488597 |
| SYT11   | 0.029997668 |
| PNOC    | 0.030409528 |
| MIF     | 0.030421444 |
| HP      | 0.030742052 |
| SCIMP   | 0.031189602 |
| DPP4    | 0.031449726 |
| TSGA10  | 0.031563783 |
| NT5E    | 0.031863303 |

|          |             |
|----------|-------------|
| CD3E     | 0.032085069 |
| CD84     | 0.032199413 |
| EPG5     | 0.03265129  |
| KIAA0922 | 0.032672605 |
| RGCC     | 0.033857897 |
| ZNF175   | 0.034388646 |
| TCN2     | 0.034643299 |
| GIMAP5   | 0.034865687 |
| CALCOCO1 | 0.035016724 |
| SPRY1    | 0.035021663 |
| RAB37    | 0.035756062 |
| RALGDS   | 0.035848622 |
| MR1      | 0.036002378 |
| TK2      | 0.036247004 |
| SATB1    | 0.036613184 |
| AHSA1    | 0.036781951 |
| LBH      | 0.037053179 |
| ICOS     | 0.037210459 |
| EOMES    | 0.037491973 |
| ZNF337   | 0.038334567 |
| ABCB1    | 0.038338698 |
| SEL1L3   | 0.038481107 |
| GPR114   | 0.039101469 |
| CEBPA    | 0.039651321 |
| CD244    | 0.040815988 |
| MCCC1    | 0.040827961 |
| EVL      | 0.040857808 |
| COBLL1   | 0.041509242 |
| PTK2B    | 0.042064029 |
| PPP2R2B  | 0.042087158 |
| LUC7L    | 0.042127604 |
| TCL1A    | 0.042135356 |
| FGR      | 0.042511035 |
| PLEK     | 0.042542361 |
| SLC9A9   | 0.0426245   |
| CHI3L2   | 0.042716285 |
| LILRB1   | 0.042824055 |
| LRRN3    | 0.04295568  |
| JAKMIP1  | 0.043320457 |
| NUCB2    | 0.043346671 |
| NLRP3    | 0.043847267 |
| WDR4     | 0.044201546 |
| RAD54B   | 0.044690105 |
| NIPAL3   | 0.045968197 |

|          |             |
|----------|-------------|
| MBOAT1   | 0.046665817 |
| ZBED5    | 0.046897658 |
| PDCD4    | 0.046947744 |
| NCAM1    | 0.047690247 |
| ALOX5AP  | 0.048254    |
| PLCG1    | 0.048342141 |
| PLEKHF1  | 0.04861097  |
| SH3YL1   | 0.049591303 |
| BCL11B   | 0.049901544 |
| PPAT     | 0.050315951 |
| ASCL2    | 0.050382189 |
| HCG27    | 0.05073459  |
| RHOC     | 0.050842265 |
| IQCG     | 0.051253516 |
| TNF      | 0.051389206 |
| LDLRAP1  | 0.051534174 |
| P2RX7    | 0.051568791 |
| ANXA2    | 0.051730848 |
| BZW2     | 0.051741444 |
| CAMK4    | 0.051755595 |
| MZB1     | 0.052493066 |
| WDR59    | 0.054445442 |
| ACVR2A   | 0.054658177 |
| KIAA1147 | 0.055284428 |
| F13A1    | 0.055295661 |
| CLDND2   | 0.055542669 |
| SPOCK2   | 0.055817377 |
| HIST1H3H | 0.055818742 |
| GFI1     | 0.056274258 |
| ZNF573   | 0.056773119 |
| ELP2     | 0.057339947 |
| LEF1     | 0.057355584 |
| PRIM1    | 0.058973481 |
| CCT3     | 0.059230029 |
| ITFG2    | 0.060069712 |
| ACSL1    | 0.060607903 |
| CCDC170  | 0.062345901 |
| CCT4     | 0.062507368 |
| HSD17B8  | 0.062791272 |
| CST7     | 0.062945279 |
| FUCA2    | 0.064388478 |
| LTA      | 0.064811425 |
| FGL2     | 0.065229592 |
| IL12RB1  | 0.065863946 |

|          |             |
|----------|-------------|
| FASLG    | 0.066660871 |
| FCGR2B   | 0.067329291 |
| NAA16    | 0.067636382 |
| ZBP1     | 0.067861269 |
| CACYBP   | 0.068197487 |
| EML4     | 0.068422792 |
| CCT2     | 0.068565089 |
| GPR97    | 0.068764044 |
| CYB561   | 0.068854878 |
| SLC26A8  | 0.069043955 |
| TNFAIP6  | 0.06924501  |
| ANP32B   | 0.069353189 |
| VAMP5    | 0.069700598 |
| ZEB2     | 0.069942567 |
| APH1B    | 0.070450607 |
| MAPKAPK3 | 0.070591509 |
| FAM126B  | 0.070752206 |
| GRAP     | 0.070872556 |
| GNGT2    | 0.071531791 |
| OAS1     | 0.071563775 |
| FAM53B   | 0.072242241 |
| GAS7     | 0.073016751 |
| BCKDHB   | 0.07352782  |
| VCAN     | 0.073673442 |
| GRB10    | 0.074546297 |
| EFHD2    | 0.074769679 |
| EPHA4    | 0.07529201  |
| MT1A     | 0.075387405 |
| RPAIN    | 0.075426872 |
| FXR1     | 0.077832652 |
| UBR2     | 0.078051241 |
| AGFG1    | 0.07840271  |
| ACTN4    | 0.078510167 |
| TRAFD1   | 0.078952267 |
| EPB41L4A | 0.079993342 |
| IPCEF1   | 0.080787248 |
| NOP2     | 0.081097028 |
| CD8B     | 0.08146778  |
| SOX8     | 0.081922932 |
| HSPA9    | 0.082833793 |
| SLC27A3  | 0.082863175 |
| DOK2     | 0.08365336  |
| OASL     | 0.08526124  |
| ABHD16A  | 0.085354882 |

|          |             |
|----------|-------------|
| IGFBP3   | 0.085780372 |
| VNN1     | 0.085967805 |
| NCL      | 0.086682523 |
| MS4A6A   | 0.08670391  |
| ITGAM    | 0.086793452 |
| LPHN1    | 0.087044621 |
| BPI      | 0.088194979 |
| CCR9     | 0.088382551 |
| BCL11A   | 0.088569187 |
| SIRPG    | 0.088893331 |
| SLC25A20 | 0.089531125 |
| TBXAS1   | 0.090544007 |
| LUC7L3   | 0.091115938 |
| ARHGAP24 | 0.092118967 |
| SLC4A4   | 0.092210022 |
| ABI3     | 0.092593364 |
| TBRG4    | 0.092819571 |
| C1orf162 | 0.095357022 |
| ZNF146   | 0.09644625  |
| PLOD1    | 0.096746343 |
| CYBB     | 0.097838214 |
| SLC7A6   | 0.09839013  |
| SSBP4    | 0.098665409 |
| WDFY2    | 0.098798254 |
| CUTA     | 0.098916086 |
| ATP6V0E2 | 0.099322902 |
| SLAMF7   | 0.100082347 |
| REPS2    | 0.100733665 |
| TIGIT    | 0.101298544 |
| SLC22A15 | 0.102698445 |
| FANCA    | 0.103033796 |
| SLC1A7   | 0.103165168 |
| PGD      | 0.103265748 |
| INPP5D   | 0.103564262 |
| SERPINF1 | 0.105933097 |
| HADH     | 0.106251448 |
| COLQ     | 0.106557647 |
| GNPTAB   | 0.106884774 |
| SERBP1   | 0.107083543 |
| F5       | 0.107327018 |
| RABGGTB  | 0.107404004 |
| NOLC1    | 0.107643294 |
| DCAF4    | 0.107723088 |
| APMAP    | 0.108156207 |

|          |             |
|----------|-------------|
| KLF4     | 0.109025005 |
| ALG8     | 0.109537884 |
| HSPA6    | 0.109840583 |
| IL27RA   | 0.110492302 |
| KLF10    | 0.110582077 |
| ZNF550   | 0.110600024 |
| NBEA     | 0.11108761  |
| CCT8     | 0.111882021 |
| EIF2S3   | 0.112192151 |
| HSF2     | 0.112472865 |
| DUSP3    | 0.112689957 |
| AK5      | 0.112946802 |
| PHF14    | 0.113577662 |
| NOD2     | 0.113662294 |
| HK3      | 0.114737612 |
| ADAP2    | 0.115378765 |
| DUSP5    | 0.115398319 |
| ATIC     | 0.116039735 |
| GPR141   | 0.1171447   |
| TGFBR2   | 0.117334801 |
| RCAN3    | 0.117862177 |
| TXNDC5   | 0.117924111 |
| ATXN1    | 0.119124323 |
| SLC16A10 | 0.119478964 |
| NSUN6    | 0.12014219  |
| FAM46A   | 0.120521682 |
| TP53I11  | 0.120666733 |
| MEOX1    | 0.120724123 |
| PITPNC1  | 0.121053885 |
| PAFAH1B3 | 0.121646392 |
| IGLL1    | 0.122786211 |
| PAQR4    | 0.123237298 |
| MEGF9    | 0.12395911  |
| C21orf2  | 0.123972089 |
| CD86     | 0.124347722 |
| RRP1B    | 0.124458012 |
| PLBD1    | 0.125046344 |
| RASSF1   | 0.125093187 |
| IGIP     | 0.125173942 |
| HOOK1    | 0.125418215 |
| PAPSS2   | 0.125518918 |
| SRSF5    | 0.126096409 |
| TNFRSF25 | 0.126266787 |
| CD300C   | 0.126351085 |

|           |             |
|-----------|-------------|
| RPS6      | 0.126360526 |
| AKAP7     | 0.126933705 |
| CPQ       | 0.127883303 |
| KIAA0319L | 0.128069747 |
| IFI30     | 0.128917745 |
| MTHFD1L   | 0.129984487 |
| EFNA1     | 0.130624386 |
| GNG2      | 0.130865144 |
| CMKLR1    | 0.131307664 |
| FGF9      | 0.131355502 |
| CYP2E1    | 0.132714646 |
| B3GAT1    | 0.133208139 |
| ORM1      | 0.135020638 |
| PDE3B     | 0.135039172 |
| IDS       | 0.135193434 |
| FARSB     | 0.135503279 |
| FAM117B   | 0.136589384 |
| TTC38     | 0.137016785 |
| DENR      | 0.137087349 |
| PLXDC2    | 0.137095032 |
| METTL25   | 0.137876603 |
| TARBP1    | 0.137973136 |
| CXCL16    | 0.138145828 |
| PACSIN1   | 0.138188452 |
| MRPS31    | 0.138204622 |
| FEZ1      | 0.138302166 |
| TNFRSF1B  | 0.138785817 |
| GRWD1     | 0.138960943 |
| DOCK10    | 0.139321123 |
| ADORA2A   | 0.142345975 |
| IRF9      | 0.142926674 |
| DDX21     | 0.142933133 |
| HMGB2     | 0.143873633 |
| BTN3A1    | 0.146149641 |
| CTPS1     | 0.14842805  |
| ITM2A     | 0.149106831 |
| IFT74     | 0.149246603 |
| NCEH1     | 0.149439331 |
| TRAF5     | 0.149874579 |
| WIP1      | 0.150074521 |
| U2AF1L4   | 0.151760427 |
| CDC14B    | 0.151866574 |
| NUP107    | 0.152670375 |
| SRSF6     | 0.152877918 |

|          |             |
|----------|-------------|
| PNPLA6   | 0.153745787 |
| CRELD1   | 0.154004981 |
| SERPINB6 | 0.154550063 |
| SAE1     | 0.155435384 |
| TAP1     | 0.155777067 |
| ENOSF1   | 0.156206394 |
| C10orf35 | 0.156273229 |
| RRAS     | 0.157482296 |
| KIF1B    | 0.157743802 |
| THEM6    | 0.157757979 |
| LSM5     | 0.159759159 |
| GLIPR2   | 0.159931258 |
| DENND1A  | 0.160976502 |
| FOXJ3    | 0.161031731 |
| GZMA     | 0.161471173 |
| SMAD7    | 0.161826438 |
| DDX10    | 0.161906938 |
| C1QBP    | 0.162574427 |
| TMEM5    | 0.162986316 |
| SCD      | 0.164481444 |
| GDPD5    | 0.164833894 |
| RAPGEF6  | 0.165266132 |
| VOPP1    | 0.166625783 |
| TTC3     | 0.166916964 |
| TFAM     | 0.167187581 |
| FLVCR2   | 0.16771553  |
| ZNF721   | 0.168054259 |
| MGLL     | 0.16819184  |
| EIF4A3   | 0.168193098 |
| CSF1R    | 0.16963385  |
| SRPK1    | 0.169792172 |
| GYPE     | 0.170079683 |
| CAPNS1   | 0.170453707 |
| DMXL2    | 0.171605579 |
| GAR1     | 0.171753665 |
| FHOD1    | 0.172645982 |
| PRKCA    | 0.172917606 |
| STIP1    | 0.174184776 |
| CFLAR    | 0.175217504 |
| DUSP10   | 0.176891445 |
| NME1     | 0.177929209 |
| TPM2     | 0.178439653 |
| PARP3    | 0.178660296 |
| PODXL2   | 0.178768201 |



|          |             |
|----------|-------------|
| PALLD    | 0.179437131 |
| BMX      | 0.180120999 |
| AKAP13   | 0.180767603 |
| CCNB1IP1 | 0.181015706 |
| GZMH     | 0.181516464 |
| ITGA2B   | 0.183096456 |
| DENND2D  | 0.183209723 |
| CYP1B1   | 0.184956993 |
| PAG1     | 0.185084496 |
| MYC      | 0.185143454 |
| YTHDF1   | 0.185568154 |
| AGPAT2   | 0.185672827 |
| SET      | 0.185840923 |
| STRBP    | 0.186164317 |
| PPAPDC1B | 0.187407004 |
| CNN3     | 0.187514598 |
| E2F2     | 0.188074145 |
| USP3     | 0.188336388 |
| CMTM8    | 0.188656082 |
| CCT7     | 0.189517336 |
| ZNF189   | 0.190133637 |
| VCL      | 0.190427696 |
| PDZD4    | 0.191051863 |
| NOL11    | 0.192147174 |
| CTSD     | 0.193110952 |
| ST13     | 0.194930448 |
| ZCCHC7   | 0.195483712 |
| SLC20A1  | 0.196675283 |
| PRDM1    | 0.197945884 |
| ADK      | 0.199687129 |
| KLF11    | 0.200314041 |
| PFKFB2   | 0.2006698   |
| MS4A4A   | 0.20158322  |
| VSIG4    | 0.20162562  |
| HDAC2    | 0.206957485 |
| DPPA4    | 0.207555294 |
| KLHL3    | 0.207719572 |
| CDK6     | 0.208850405 |
| SERPINE2 | 0.209887539 |
| MPO      | 0.20998339  |
| CLUAP1   | 0.211756549 |
| OSBPL10  | 0.213705643 |
| SESTD1   | 0.213866614 |
| S100A12  | 0.214674876 |

|          |             |
|----------|-------------|
| CLIC1    | 0.214749564 |
| NPAT     | 0.215077552 |
| S1PR5    | 0.215886332 |
| ENDOD1   | 0.216456704 |
| SLC38A1  | 0.217804743 |
| LOXL3    | 0.219411559 |
| ZRANB2   | 0.220190605 |
| RUVBL1   | 0.220462509 |
| TIMP1    | 0.220914407 |
| PRDM8    | 0.221775197 |
| EIF3M    | 0.223255313 |
| EIF3E    | 0.223672076 |
| RRS1     | 0.224875937 |
| TC2N     | 0.225134966 |
| ANAPC16  | 0.22534194  |
| SAAL1    | 0.226050054 |
| MARCO    | 0.226162094 |
| C10orf2  | 0.226932689 |
| LGMN     | 0.22827739  |
| OSBPL5   | 0.230432167 |
| LDHB     | 0.23062345  |
| STAT1    | 0.231057497 |
| APLP2    | 0.231154809 |
| STX11    | 0.231285071 |
| CCDC57   | 0.231737186 |
| TSR1     | 0.231933605 |
| ATM      | 0.233672146 |
| HAVCR2   | 0.235526853 |
| CHORDC1  | 0.236420612 |
| MAFB     | 0.237319329 |
| STAT3    | 0.237645554 |
| BCL6     | 0.238635294 |
| HSPE1    | 0.238683976 |
| THOC1    | 0.238812722 |
| RBM11    | 0.239476809 |
| EDARADD  | 0.241803755 |
| FBXO6    | 0.242149686 |
| ADPRM    | 0.243447258 |
| SNX11    | 0.244068416 |
| ARHGEF18 | 0.244896021 |
| AOAH     | 0.244911323 |
| INPPL1   | 0.245100151 |
| EIF3H    | 0.2455599   |
| MTR      | 0.245902561 |

|          |             |
|----------|-------------|
| SLCO3A1  | 0.24613333  |
| CD72     | 0.247502365 |
| CRLF3    | 0.247538501 |
| ZNF529   | 0.24778597  |
| PLAC8    | 0.248335038 |
| ABCE1    | 0.24860809  |
| KLRF1    | 0.252860822 |
| ZNF329   | 0.253408076 |
| KLHL34   | 0.253436336 |
| ZDHHC9   | 0.253824767 |
| TRMT13   | 0.253947005 |
| C3AR1    | 0.254038187 |
| GBP1     | 0.255304073 |
| GDE1     | 0.255544095 |
| FAM129B  | 0.257040479 |
| HNRNPM   | 0.258028013 |
| DUSP18   | 0.259575173 |
| FLT3LG   | 0.260073787 |
| TSPAN3   | 0.260404144 |
| ITPRIP   | 0.260902548 |
| PVRIG    | 0.261090931 |
| PLAG1    | 0.261247837 |
| RPF2     | 0.261504564 |
| C12orf65 | 0.2620445   |
| LAIR2    | 0.262546304 |
| POLR1C   | 0.263582784 |
| FBXL5    | 0.2638435   |
| MFN2     | 0.263918041 |
| SPON2    | 0.264215837 |
| GTPBP4   | 0.264300314 |
| ANTXR2   | 0.264499997 |
| GPA33    | 0.264902099 |
| RCL1     | 0.265458107 |
| MXRA7    | 0.265918826 |
| CCL5     | 0.267007797 |
| SH2D3A   | 0.267423396 |
| FKBP11   | 0.270034786 |
| ZNF800   | 0.270922624 |
| CEPT1    | 0.271692942 |
| MYOF     | 0.275213461 |
| RPP40    | 0.276078872 |
| SRM      | 0.276403907 |
| CBY1     | 0.276884374 |
| MBTPS1   | 0.277109845 |

|          |             |
|----------|-------------|
| IL15     | 0.278656376 |
| ZNF548   | 0.279597219 |
| DZIP3    | 0.280728654 |
| UBE2G2   | 0.280876495 |
| OXNAD1   | 0.281034501 |
| TMEM204  | 0.281276051 |
| OGDH     | 0.28226809  |
| EPM2A    | 0.28450602  |
| AUTS2    | 0.284712836 |
| RASGRP3  | 0.284742944 |
| LYRM4    | 0.285008876 |
| ARHGAP32 | 0.286550795 |
| TTYH3    | 0.290403462 |
| ZNF544   | 0.291219619 |
| NUP62    | 0.291424531 |
| FGFBP2   | 0.29255223  |
| CYP4F22  | 0.295044166 |
| RAB24    | 0.296001178 |
| C5orf51  | 0.299486959 |
| LAMP5    | 0.301383889 |
| CDKN1A   | 0.301433172 |
| CNOT7    | 0.303451153 |
| PDE9A    | 0.30647309  |
| AHNAK    | 0.306610764 |
| GRAMD3   | 0.307035465 |
| RPL5     | 0.310052641 |
| LRRC8C   | 0.310267927 |
| LGALS1   | 0.31046457  |
| PARP8    | 0.311629956 |
| CD63     | 0.315590187 |
| RAB27A   | 0.316217015 |
| CD248    | 0.317160272 |
| PRSS23   | 0.317905865 |
| SNRPF    | 0.318643453 |
| GUSB     | 0.31882341  |
| LEO1     | 0.319099143 |
| TBC1D4   | 0.320631193 |
| SIAH2    | 0.321018127 |
| LGALS1   | 0.321511538 |
| PHGDH    | 0.321822931 |
| ID3      | 0.322087814 |
| ANKRD22  | 0.323292624 |
| CLSTN3   | 0.324231828 |
| GART     | 0.325090772 |

|          |             |
|----------|-------------|
| DDX31    | 0.325156152 |
| RASGRP1  | 0.325952237 |
| TMEM42   | 0.326151666 |
| ANXA1    | 0.327158134 |
| NARS2    | 0.329177723 |
| CERS6    | 0.329624714 |
| PDCD2L   | 0.329892829 |
| LMNA     | 0.333204214 |
| METRNL   | 0.333910359 |
| RBPJ     | 0.334409867 |
| IGFBP7   | 0.335763482 |
| MRPL3    | 0.336499057 |
| FLNB     | 0.338985314 |
| ARF3     | 0.339125045 |
| ATP1B3   | 0.340459924 |
| FBL      | 0.3408871   |
| FOXD2    | 0.341381545 |
| KLRD1    | 0.342416133 |
| C1orf216 | 0.34326666  |
| FAM50B   | 0.344622823 |
| CD70     | 0.3447467   |
| HIC2     | 0.34501989  |
| NACA     | 0.345294658 |
| GNS      | 0.345539965 |
| PKIA     | 0.345934579 |
| GPR137B  | 0.346679102 |
| UFM1     | 0.346883379 |
| GBP5     | 0.348194807 |
| ARMCX2   | 0.348301888 |
| HNRNPD   | 0.349147379 |
| SRRM1    | 0.349361541 |
| VEGFB    | 0.350817337 |
| APOBEC3G | 0.35104058  |
| ATL3     | 0.352445915 |
| CCDC109B | 0.354129724 |
| CECR5    | 0.354498104 |
| C16orf58 | 0.354913181 |
| EIF4EBP2 | 0.356949687 |
| EIF4A2   | 0.357379438 |
| PPP2R5C  | 0.357718366 |
| RALA     | 0.359389751 |
| ERBB2    | 0.360524728 |
| SERINC5  | 0.360723222 |
| OXCT1    | 0.361105383 |

|          |             |
|----------|-------------|
| PPIL3    | 0.361602493 |
| MGST3    | 0.363466124 |
| ZNF581   | 0.363783655 |
| LIG1     | 0.364285981 |
| DIAPH1   | 0.364328674 |
| SLC25A15 | 0.364777601 |
| TPT1     | 0.365058845 |
| SUPT3H   | 0.365739868 |
| EI24     | 0.367026752 |
| UBAP2    | 0.367756104 |
| SLC22A4  | 0.367789048 |
| MTRF1    | 0.369447481 |
| SMARCA1  | 0.370270565 |
| NSUN2    | 0.372148769 |
| PCNX     | 0.374051232 |
| PAM      | 0.374126076 |
| TGDS     | 0.374580395 |
| QTRT1    | 0.37479632  |
| TEX10    | 0.374989612 |
| HNRNPA0  | 0.375801502 |
| FAM160A2 | 0.377714694 |
| C6orf48  | 0.3777171   |
| DIRC2    | 0.379567122 |
| RPP21    | 0.382036569 |
| ANKRD46  | 0.382371685 |
| RARRES3  | 0.382992149 |
| PARP1    | 0.385533181 |
| C22orf29 | 0.385941824 |
| ZNF683   | 0.386813932 |
| ACADVL   | 0.387151599 |
| VARS     | 0.387203908 |
| PRF1     | 0.387937583 |
| SLC31A2  | 0.388176009 |
| PDK4     | 0.388645161 |
| ZCCHC11  | 0.389895092 |
| VAMP3    | 0.39052066  |
| HSPA8    | 0.392959493 |
| TCF4     | 0.394003422 |
| UBIAD1   | 0.394169063 |
| PTGER2   | 0.394966522 |
| DEFA4    | 0.395766729 |
| PUS1     | 0.397079814 |
| TSHZ2    | 0.397176362 |
| LTBP3    | 0.39935719  |

|          |             |
|----------|-------------|
| ETFDH    | 0.399445402 |
| LSM4     | 0.399975698 |
| ABR      | 0.400955909 |
| ANG      | 0.402173151 |
| H2AFY2   | 0.402426535 |
| MRPS26   | 0.402843438 |
| BATF     | 0.402845561 |
| EXOSC2   | 0.403071801 |
| WDR75    | 0.404393398 |
| EDAR     | 0.405089069 |
| FRMD3    | 0.406545947 |
| DKC1     | 0.407001362 |
| PRKACB   | 0.407797462 |
| TXK      | 0.40904873  |
| CTNNA1   | 0.409794292 |
| PIK3C2B  | 0.410052166 |
| UXT      | 0.410118478 |
| WARS     | 0.410345048 |
| PAQR8    | 0.410726319 |
| NCBP2    | 0.411472421 |
| NOG      | 0.411707311 |
| ANKS1A   | 0.412233213 |
| CCNC     | 0.413117132 |
| TNFRSF21 | 0.413186399 |
| EXOSC5   | 0.413579991 |
| WDR1     | 0.413749621 |
| HIBADH   | 0.4138967   |
| ZZZ3     | 0.414416308 |
| MRPS9    | 0.415670749 |
| DCXR     | 0.415719245 |
| SPTBN1   | 0.416286907 |
| VRK1     | 0.417842852 |
| AGPAT5   | 0.419088337 |
| PLOD3    | 0.419661464 |
| TCEA2    | 0.422652304 |
| CPT1A    | 0.42479936  |
| PDZK1IP1 | 0.427592465 |
| PPWD1    | 0.428146401 |
| PRPF19   | 0.428276763 |
| ADAR     | 0.431884836 |
| RPS4X    | 0.432367022 |
| DYNLT1   | 0.433091252 |
| RPL11    | 0.433245228 |
| LARP4    | 0.433883284 |

|          |             |
|----------|-------------|
| PDIA5    | 0.43402988  |
| RUNX3    | 0.434587395 |
| UBA52    | 0.434599818 |
| GTPBP3   | 0.434905035 |
| CPNE8    | 0.43504352  |
| DGKG     | 0.436305068 |
| C1orf109 | 0.437489601 |
| GAL3ST4  | 0.437508944 |
| TIMM9    | 0.439208231 |
| NPM3     | 0.439400841 |
| ATP5G2   | 0.440033311 |
| USF1     | 0.440324354 |
| WBP1L    | 0.44063249  |
| RPS16    | 0.441683799 |
| HSPH1    | 0.442557652 |
| CFH      | 0.442937316 |
| TOP1MT   | 0.443270428 |
| ATP5G1   | 0.443428166 |
| MIS12    | 0.443532671 |
| NLRC5    | 0.444401821 |
| CPM      | 0.444822247 |
| FAM134A  | 0.445241683 |
| MAF      | 0.448012461 |
| UPP1     | 0.449311622 |
| CD163    | 0.449450406 |
| EIF3D    | 0.449579038 |
| C11orf31 | 0.450773837 |
| ZNF385A  | 0.450974164 |
| GSPT2    | 0.452043055 |
| SLC31A1  | 0.452651645 |
| RPS14    | 0.452802397 |
| MZF1     | 0.45463759  |
| ALG13    | 0.455037556 |
| TCTN1    | 0.456947943 |
| ARG1     | 0.457139769 |
| FAR2     | 0.457465967 |
| PLA2G16  | 0.457482747 |
| RPLP0    | 0.458362995 |
| SPON1    | 0.458488881 |
| MRPS27   | 0.460717622 |
| E2F5     | 0.46178325  |
| OCIAD2   | 0.461912462 |
| HNRNPH1  | 0.462496451 |
| MAML2    | 0.463150731 |



|         |             |
|---------|-------------|
| IRAK3   | 0.463205061 |
| TNFAIP8 | 0.463563465 |
| ETV6    | 0.464419301 |
| ZBTB25  | 0.465297392 |
| UBE2F   | 0.466215845 |
| APRT    | 0.466462437 |
| TAF4    | 0.467025959 |
| CHMP7   | 0.467270424 |
| YTHDC1  | 0.46766947  |
| LHFPL2  | 0.468151531 |
| KAT2A   | 0.469490057 |
| CELA1   | 0.47019178  |
| FAM220A | 0.472291846 |
| RNMTL1  | 0.472357993 |
| P2RX5   | 0.475364598 |
| FCGR1A  | 0.475428601 |
| MMP9    | 0.475947828 |
| PUS7    | 0.476828614 |
| QPCT    | 0.478173958 |
| LPP     | 0.479694396 |
| NUP88   | 0.481687843 |
| PLIN2   | 0.481802349 |
| BYSL    | 0.483006281 |
| CYP2J2  | 0.487201916 |
| NOP58   | 0.488067898 |
| NCR1    | 0.488426353 |
| RPS13   | 0.488430874 |
| PPA1    | 0.490564091 |
| STMN1   | 0.490783587 |
| RAP2A   | 0.490991786 |
| AHCY    | 0.493725783 |
| GPATCH4 | 0.494704556 |
| GNLY    | 0.495524353 |
| DYSF    | 0.496321465 |
| KRI1    | 0.496473294 |
| ELF4    | 0.497647134 |
| SLC39A1 | 0.498517743 |
| NPC1    | 0.499172339 |
| NAA25   | 0.500294943 |
| SRSF1   | 0.500725236 |
| PRMT1   | 0.50101576  |
| DYRK2   | 0.502238681 |
| TRIM69  | 0.503340746 |
| BMS1    | 0.503550133 |

|           |             |
|-----------|-------------|
| IL18BP    | 0.504043063 |
| CREB3L2   | 0.504204433 |
| PSIP1     | 0.505108702 |
| SH3PXD2A  | 0.507144518 |
| IARS      | 0.507182476 |
| PSMB9     | 0.507303114 |
| PCBD1     | 0.508605957 |
| RAB11FIP5 | 0.50901959  |
| GALNT10   | 0.509320957 |
| PRRG4     | 0.509683427 |
| NUDT9     | 0.510410001 |
| CSRP1     | 0.510497436 |
| MVP       | 0.510766386 |
| CYSTM1    | 0.510781986 |
| NOP56     | 0.511071093 |
| F2R       | 0.512382551 |
| CTPS2     | 0.512826368 |
| TASP1     | 0.513885024 |
| ERGIC1    | 0.514760688 |
| SPECC1L   | 0.515653201 |
| KIF13B    | 0.516522867 |
| TOP2B     | 0.5214337   |
| ERGIC3    | 0.522393095 |
| MAP3K5    | 0.524039445 |
| BCCIP     | 0.52600329  |
| DDX47     | 0.526645078 |
| EPRS      | 0.528483275 |
| KIF5C     | 0.528520041 |
| LEPROTL1  | 0.528789545 |
| KANSL2    | 0.528804918 |
| RNMT      | 0.5316815   |
| SHMT2     | 0.531865308 |
| LARS2     | 0.532251186 |
| EBAG9     | 0.53286777  |
| AGAP1     | 0.534082863 |
| PNPO      | 0.534882844 |
| SLC38A11  | 0.53532361  |
| N6AMT1    | 0.536078195 |
| BHLHE40   | 0.537129118 |
| PARP9     | 0.538244212 |
| SNTB2     | 0.540413643 |
| MAPK14    | 0.541216025 |
| ATF3      | 0.542026811 |
| RPS23     | 0.543222964 |

|          |             |
|----------|-------------|
| NKG7     | 0.544198947 |
| FAM13A   | 0.544290114 |
| LILRA5   | 0.54436829  |
| MFGE8    | 0.545897147 |
| SLFN11   | 0.547935467 |
| NDST1    | 0.549614867 |
| MSH6     | 0.550344154 |
| RPL4     | 0.552601096 |
| ERCC6L2  | 0.55669759  |
| OBSCN    | 0.557637996 |
| POLG2    | 0.558382426 |
| S100A8   | 0.559839091 |
| TGFBR3   | 0.560395122 |
| NGDN     | 0.560868334 |
| ZNF302   | 0.560932683 |
| CCDC50   | 0.563585794 |
| MAD2L2   | 0.565553047 |
| USP13    | 0.56733719  |
| MTA3     | 0.568247472 |
| MORC2    | 0.568261827 |
| PDCL3    | 0.569493673 |
| TMEM220  | 0.569682988 |
| PHC2     | 0.570632587 |
| NRIP1    | 0.571937329 |
| MRTO4    | 0.572518299 |
| THBS1    | 0.573862317 |
| ZNF256   | 0.574830164 |
| C11orf1  | 0.575077677 |
| IFNG     | 0.576002025 |
| PSAT1    | 0.579206472 |
| PPIL1    | 0.579283327 |
| DAP3     | 0.580030261 |
| HAPLN3   | 0.580467645 |
| TRIB1    | 0.580650221 |
| ASGR2    | 0.580707718 |
| LARP1B   | 0.580909087 |
| KIAA0355 | 0.582305278 |
| ELOVL4   | 0.583891172 |
| NBEAL2   | 0.584161054 |
| BAG3     | 0.586321454 |
| PTPN13   | 0.586407767 |
| ILF2     | 0.587022901 |
| PARP14   | 0.587791288 |
| EIF2D    | 0.587995021 |

|           |             |
|-----------|-------------|
| SH2D2A    | 0.588155344 |
| EIF3L     | 0.590597115 |
| LAPTM4B   | 0.590700648 |
| PJA1      | 0.591156008 |
| TDP1      | 0.592008583 |
| GPX7      | 0.592427916 |
| PRMT3     | 0.59310601  |
| TSPAN2    | 0.594452413 |
| ROPN1L    | 0.595247023 |
| CYFIP1    | 0.596155181 |
| MAGED1    | 0.596393239 |
| RPSAP58   | 0.596624372 |
| NGLY1     | 0.597608884 |
| EXOSC8    | 0.598252595 |
| ORC5      | 0.603114683 |
| POLE3     | 0.603999761 |
| FBXO10    | 0.604183442 |
| ARHGAP26  | 0.604302302 |
| MT1E      | 0.605199737 |
| NAT10     | 0.605542116 |
| MAP3K4    | 0.606018996 |
| SREBF1    | 0.606891773 |
| YIPF1     | 0.60705497  |
| SLFN13    | 0.607416804 |
| DPH2      | 0.607948578 |
| CD97      | 0.608048206 |
| ABHD5     | 0.609966239 |
| WDR12     | 0.610030809 |
| MATN2     | 0.612965895 |
| B4GALT5   | 0.614277356 |
| MPHOSPH10 | 0.614590814 |
| TCF3      | 0.614941769 |
| SLC7A7    | 0.616160657 |
| NOB1      | 0.616826606 |
| TMEM156   | 0.61706325  |
| PRKRA     | 0.617242237 |
| IRF1      | 0.618008066 |
| RSL1D1    | 0.618403746 |
| ZNF706    | 0.618713107 |
| RPS18     | 0.619303257 |
| POLR1E    | 0.620306403 |
| ZNF480    | 0.620400624 |
| UBTF      | 0.620523218 |
| BLOC1S1   | 0.624486753 |

|          |             |
|----------|-------------|
| CSTF3    | 0.625902119 |
| RBM14    | 0.626730849 |
| KLF12    | 0.628131446 |
| GOLGA3   | 0.628634904 |
| RPS2     | 0.63040019  |
| TRAPPC6A | 0.632630774 |
| MARS2    | 0.633386416 |
| RBFA     | 0.634183811 |
| ESYT1    | 0.63473765  |
| EEF2     | 0.635733127 |
| APBA2    | 0.636542246 |
| GYG1     | 0.638321594 |
| ZNF135   | 0.638516579 |
| DRAXIN   | 0.640902888 |
| ZNF830   | 0.641593619 |
| ZEB1     | 0.641667646 |
| NDFIP1   | 0.645595047 |
| URI1     | 0.64619699  |
| LCMT2    | 0.647824347 |
| CEP135   | 0.649756164 |
| STAT2    | 0.652108698 |
| PRPSAP2  | 0.655680679 |
| RBM17    | 0.65618872  |
| FAM213A  | 0.65626931  |
| BCL9     | 0.657748272 |
| CLNS1A   | 0.658083759 |
| CAST     | 0.658531618 |
| ITM2C    | 0.658953721 |
| PAK1IP1  | 0.659040324 |
| RPL28    | 0.660545019 |
| WDR74    | 0.662389327 |
| ANXA2R   | 0.6624619   |
| SPPL2A   | 0.664455169 |
| CDKN1C   | 0.665445604 |
| ABLIM1   | 0.665449914 |
| HMOX1    | 0.665644742 |
| GPR68    | 0.666713706 |
| TSPO     | 0.668819141 |
| HLTF     | 0.669659494 |
| NONO     | 0.670205423 |
| TOMM70A  | 0.674847441 |
| PGRMC2   | 0.675277126 |
| LCLAT1   | 0.677543366 |
| EMP1     | 0.679147991 |

|           |             |
|-----------|-------------|
| VPS51     | 0.67994748  |
| C12orf57  | 0.680034627 |
| THAP11    | 0.681820534 |
| GLTSCR2   | 0.685046615 |
| SRBD1     | 0.685520746 |
| BRIX1     | 0.685878584 |
| ABCF1     | 0.68624997  |
| TMEM123   | 0.686418174 |
| NREP      | 0.687061277 |
| BTBD11    | 0.689043897 |
| PDGFD     | 0.689114159 |
| GABARAPL1 | 0.68943038  |
| KLF6      | 0.690128896 |
| TPP2      | 0.692637328 |
| RPL8      | 0.692683839 |
| RPAP2     | 0.692749668 |
| UBAC1     | 0.696119955 |
| IMPDH2    | 0.69632431  |
| HERPUD2   | 0.696337657 |
| HMGNI     | 0.69736392  |
| HNRNPH3   | 0.698052222 |
| TRAP1     | 0.698683432 |
| SOX13     | 0.698860357 |
| STX6      | 0.699377625 |
| PASK      | 0.699672942 |
| ZNF30     | 0.699804576 |
| SMARCC1   | 0.700345232 |
| ZFAND1    | 0.701791208 |
| RPL19     | 0.702375309 |
| USP11     | 0.703061343 |
| EIF4G3    | 0.704217775 |
| ACAA2     | 0.705002014 |
| ABHD3     | 0.705152349 |
| NRG1      | 0.705230895 |
| ANAPC1    | 0.705607429 |
| AGPAT4    | 0.705629481 |
| SH2D1B    | 0.7069264   |
| TMEM230   | 0.710354962 |
| RPL17     | 0.710577146 |
| TCIRG1    | 0.710985346 |
| SAMD9L    | 0.713222719 |
| EMP3      | 0.713431019 |
| WRN       | 0.714557473 |
| FAM134B   | 0.71456295  |

|          |             |
|----------|-------------|
| SRFBP1   | 0.71521545  |
| MSH2     | 0.715399274 |
| KDM1A    | 0.71543719  |
| NHP2L1   | 0.716220739 |
| PRR5L    | 0.717967491 |
| CMTM3    | 0.719400116 |
| EPHA1    | 0.719604503 |
| BIVM     | 0.719982369 |
| GP6      | 0.720040728 |
| IPO4     | 0.722037894 |
| IDH1     | 0.722996814 |
| ACADM    | 0.724917559 |
| BLMH     | 0.72578038  |
| PRMT6    | 0.726755184 |
| RAP1GAP2 | 0.727365121 |
| MRPS18B  | 0.730748409 |
| N6AMT2   | 0.731836062 |
| ABCF2    | 0.733952603 |
| GK5      | 0.734036359 |
| RPUSD2   | 0.734220867 |
| ZNF365   | 0.734337525 |
| NOA1     | 0.734968797 |
| RNASE2   | 0.735704841 |
| IMP3     | 0.736639542 |
| TCTN3    | 0.736972258 |
| GRPEL2   | 0.737332528 |
| QSOX2    | 0.737561431 |
| MRPL45   | 0.737880448 |
| NLRP12   | 0.742401798 |
| LSM2     | 0.742749445 |
| SFXN4    | 0.743573984 |
| POLR3H   | 0.743633196 |
| PROS1    | 0.744258707 |
| KIAA0586 | 0.744708411 |
| SORCS3   | 0.744849095 |
| ZNF22    | 0.745234413 |
| ATP2B4   | 0.745325382 |
| UBE2D2   | 0.746755489 |
| ZNF121   | 0.746825576 |
| TSPAN13  | 0.746889463 |
| TSPYL5   | 0.747265712 |
| BNIP3    | 0.751434261 |
| ZNF260   | 0.751677714 |
| ARHGAP19 | 0.754949642 |

|          |             |
|----------|-------------|
| ZNF827   | 0.757332085 |
| CLPP     | 0.757894193 |
| TPST1    | 0.758106846 |
| EBP      | 0.766471149 |
| PIGN     | 0.766693314 |
| BOD1     | 0.767154    |
| SSH1     | 0.768195951 |
| TSEN2    | 0.768544302 |
| LRPPRC   | 0.76884842  |
| CIAPIN1  | 0.769216473 |
| GCNT1    | 0.770578235 |
| GEMIN4   | 0.771743086 |
| LGR6     | 0.772933342 |
| USP47    | 0.773678659 |
| LRRFIP2  | 0.777737488 |
| CHN1     | 0.778202981 |
| GLA      | 0.77854301  |
| MSC      | 0.779139775 |
| ATP5L    | 0.780454006 |
| CALML4   | 0.782639197 |
| TBC1D2   | 0.78273096  |
| TIGD7    | 0.782848453 |
| HSP90AB1 | 0.783333343 |
| SYNE2    | 0.78418415  |
| VPS33A   | 0.784434184 |
| FUT8     | 0.784490499 |
| CEP41    | 0.785869085 |
| PIGP     | 0.786024399 |
| DCK      | 0.787865972 |
| VAV3     | 0.79320582  |
| RPSA     | 0.79402995  |
| FAM43A   | 0.795875199 |
| NOC3L    | 0.796283363 |
| APEX1    | 0.796889103 |
| NAGA     | 0.798732411 |
| MFSD10   | 0.799325784 |
| TMEM99   | 0.799507863 |
| ANXA5    | 0.799954148 |
| ALKBH2   | 0.800387473 |
| MRPL24   | 0.800609405 |
| AKR1B1   | 0.801896882 |
| NET1     | 0.80245714  |
| NSUN5    | 0.802866347 |
| GZMB     | 0.803418595 |



|          |             |
|----------|-------------|
| IPO11    | 0.808154459 |
| NOSIP    | 0.808284942 |
| AKR1C3   | 0.809532371 |
| ADAMTSL4 | 0.809930448 |
| KDSR     | 0.810286011 |
| STOM     | 0.8113429   |
| GSTO1    | 0.812485344 |
| IFIT3    | 0.812541297 |
| RPL27A   | 0.812864219 |
| CD7      | 0.814068799 |
| RPS20    | 0.814705463 |
| DHPS     | 0.815496976 |
| LARS     | 0.816930945 |
| SDCCAG3  | 0.817096331 |
| MRPS33   | 0.818975011 |
| TMEM209  | 0.821136708 |
| EBF1     | 0.822521379 |
| XPO4     | 0.823777231 |
| PFKFB4   | 0.824094564 |
| TAGLN    | 0.824403326 |
| TCF7     | 0.824488447 |
| SYPL1    | 0.824853452 |
| CHCHD10  | 0.825432289 |
| TRIM44   | 0.827451899 |
| MRPL35   | 0.82843989  |
| PHTF1    | 0.828970963 |
| GALC     | 0.829223276 |
| MYD88    | 0.829385901 |
| MYL6     | 0.829779657 |
| NUP160   | 0.830504394 |
| ZNF567   | 0.831127984 |
| CD58     | 0.83178799  |
| PPAN     | 0.832294864 |
| CD151    | 0.832775766 |
| PTPLAD1  | 0.833336586 |
| BACH2    | 0.834497517 |
| CDC16    | 0.835242272 |
| SGPL1    | 0.836881584 |
| RPS6KB1  | 0.841132945 |
| PCSK5    | 0.841387792 |
| RPL18    | 0.841418692 |
| MGAM     | 0.841996083 |
| EEF1B2   | 0.843238103 |
| KIAA0020 | 0.843872326 |

|          |             |
|----------|-------------|
| QSOX1    | 0.84403826  |
| NACC2    | 0.844543254 |
| CTSC     | 0.844637336 |
| RPS29    | 0.845363856 |
| ZNF239   | 0.845462214 |
| DHRS9    | 0.845485046 |
| TTC27    | 0.846756934 |
| METAP2   | 0.847552968 |
| NUAK1    | 0.847813021 |
| RPL30    | 0.848291903 |
| RRP15    | 0.849508617 |
| GAMT     | 0.849913041 |
| FAM102A  | 0.850233437 |
| FOXO1    | 0.851058512 |
| RPL35    | 0.85144897  |
| RDH14    | 0.853158074 |
| LAGE3    | 0.853222594 |
| RIOK1    | 0.853342189 |
| TRMT5    | 0.853531194 |
| MPHOSPH9 | 0.854812959 |
| UBXN1    | 0.858571394 |
| GORASP2  | 0.861499232 |
| CAPN2    | 0.86158577  |
| SERTAD2  | 0.863588544 |
| CDK14    | 0.865137442 |
| AKIRIN2  | 0.866515558 |
| RPL22    | 0.866705639 |
| RPUSD4   | 0.868899973 |
| LYPD2    | 0.870536849 |
| RAB31    | 0.877627074 |
| GPX1     | 0.877998597 |
| ZNF428   | 0.879223976 |
| TBCB     | 0.879763883 |
| METTL1   | 0.88071271  |
| TRA2B    | 0.880820103 |
| GNB2L1   | 0.880835785 |
| FBLN2    | 0.881144332 |
| SERPINB8 | 0.882443362 |
| PDE7A    | 0.883662645 |
| EIF2A    | 0.883807875 |
| LGALS3BP | 0.88480162  |
| LTV1     | 0.885113262 |
| ACTA2    | 0.885879493 |
| SEH1L    | 0.886343706 |

|          |             |
|----------|-------------|
| TCERG1   | 0.887064904 |
| ZNHIT6   | 0.887213559 |
| NKRF     | 0.887286538 |
| SMARCAD1 | 0.887841823 |
| SLITRK4  | 0.889128328 |
| DDX18    | 0.889232065 |
| DPH5     | 0.89006797  |
| FBXO15   | 0.890316536 |
| SCML1    | 0.891686225 |
| TRMT112  | 0.891828722 |
| GBA      | 0.89217241  |
| RPL13    | 0.893093136 |
| MMP28    | 0.894595268 |
| HSP90B1  | 0.894955105 |
| RBM26    | 0.895367045 |
| CSNK2A2  | 0.895622069 |
| NIN      | 0.896197476 |
| SH3BP2   | 0.897535762 |
| SH3BGRL3 | 0.898385209 |
| TOMM20   | 0.89896126  |
| RIOK2    | 0.899845338 |
| RPL36    | 0.901836572 |
| TIPARP   | 0.90232881  |
| TNFSF13B | 0.902628646 |
| CDC42EP4 | 0.903480779 |
| STARD3NL | 0.90458391  |
| EBPL     | 0.905651079 |
| PNN      | 0.906423079 |
| ACOT9    | 0.907267153 |
| CLEC4E   | 0.907608161 |
| ZNF234   | 0.911712544 |
| TRIM21   | 0.914089939 |
| NAP1L1   | 0.914624465 |
| PDGFRB   | 0.916335336 |
| CBLL1    | 0.916902474 |
| CRIP1    | 0.91745293  |
| SERPINB1 | 0.91798126  |
| EFHD1    | 0.918087442 |
| TNIP3    | 0.919294101 |
| NOL6     | 0.92054641  |
| DDX1     | 0.92067858  |
| BIN1     | 0.922617326 |
| TADA3    | 0.923143575 |
| BCS1L    | 0.92737565  |

|          |             |
|----------|-------------|
| ARHGEF40 | 0.928440676 |
| ADAM17   | 0.928520211 |
| NMT2     | 0.928723423 |
| HDAC1    | 0.929393882 |
| EIF3G    | 0.929673542 |
| EIF4B    | 0.929978567 |
| ZMYND19  | 0.930114694 |
| SEPHS1   | 0.930391893 |
| WDR89    | 0.932592668 |
| ILK      | 0.932638116 |
| PTP4A2   | 0.933437954 |
| UTP14A   | 0.935394177 |
| EWSR1    | 0.936871242 |
| CDCA7L   | 0.938529531 |
| ATG7     | 0.938784157 |
| SLC26A6  | 0.940679905 |
| CIRH1A   | 0.940725375 |
| APOBEC3C | 0.94076532  |
| NFKB1    | 0.942370164 |
| DNAJA3   | 0.943688779 |
| SURF6    | 0.944183013 |
| RNF144A  | 0.945106644 |
| DDX55    | 0.945747924 |
| ANXA4    | 0.948599808 |
| DOLPP1   | 0.948855542 |
| DNMT1    | 0.949946352 |
| GTF3A    | 0.950304818 |
| PPRC1    | 0.95130054  |
| BNC2     | 0.952467667 |
| CMSS1    | 0.952655278 |
| TLN1     | 0.952894188 |
| TRAF3IP2 | 0.954597667 |
| VNN3     | 0.95469514  |
| IL10RB   | 0.955080099 |
| FAM214B  | 0.955283835 |
| HIVEP2   | 0.955706417 |
| AARS     | 0.957575283 |
| ETS1     | 0.957693746 |
| ATAD1    | 0.958042255 |
| DIMT1    | 0.958576559 |
| SUSD1    | 0.958675105 |
| DNMT3A   | 0.959646325 |
| SH3BP5L  | 0.960381895 |
| TFB2M    | 0.96430821  |

|          |             |
|----------|-------------|
| TRIB2    | 0.964476696 |
| NXT1     | 0.964773863 |
| AGPAT3   | 0.965295304 |
| OCIAD1   | 0.965706573 |
| CRISPLD2 | 0.968126438 |
| ADSL     | 0.968180979 |
| TIMM21   | 0.96900108  |
| TIMD4    | 0.970046143 |
| SRPRB    | 0.970805251 |
| TSPAN17  | 0.9708444   |
| NOL8     | 0.972390339 |
| VIM      | 0.972433186 |
| DEDD     | 0.973149497 |
| SUMF2    | 0.974300614 |
| TYSND1   | 0.974325911 |
| DLGAP4   | 0.974452596 |
| THNSL1   | 0.975578458 |
| PFAS     | 0.975670688 |
| DGKA     | 0.976490062 |
| NSMCE1   | 0.976556126 |
| TMTC1    | 0.976666879 |
| PADI4    | 0.977762968 |
| RCN2     | 0.977889898 |
| CDK4     | 0.978048771 |
| TUT1     | 0.978146224 |
| C12orf75 | 0.980123926 |
| MAPK1    | 0.981667844 |
| GPR56    | 0.982102309 |
| EHD4     | 0.982822982 |
| CXXC5    | 0.984064434 |
| MAK16    | 0.984473753 |
| GNL3     | 0.988697142 |
| PTPRK    | 0.989812507 |
| TMEM97   | 0.990079653 |
| ABCC3    | 0.992832902 |
| AFG3L2   | 0.993874273 |
| DHX15    | 0.996171272 |
| TMBIM1   | 0.997057379 |
| POLRMT   | 0.998303741 |
| PCED1B   | 0.999311704 |
| GLMN     | 0.999545544 |
| ICAM4    | NA          |

---

**Table S5 The identified 21 aging-related genes and their regression coefficients in the TCGA LUAD cohort**

| Gene symbol | Regression coefficient |
|-------------|------------------------|
| ZNF101      | -0.085659113           |
| PLEKHB1     | -0.081330886           |
| P2RX1       | -0.047928796           |
| EIF2AK3     | -0.035468225           |
| LPAR6       | -0.032761645           |
| ATF7IP2     | -0.031678475           |
| MS4A1       | -0.0288228             |
| CCR2        | -0.027473396           |
| ZNF10       | -0.025462253           |
| AKTIP       | -0.011730398           |
| GNG7        | -0.007552353           |
| DAAM2       | -0.005509787           |
| PTTG1       | 0.004459918            |
| IL1R2       | 0.011251534            |
| KYNU        | 0.012512481            |
| TCN1        | 0.014731912            |
| ITGA6       | 0.036256529            |
| AHSA1       | 0.038877084            |
| DSC1        | 0.04688018             |
| LINGO2      | 0.063459528            |
| C1QTNF6     | 0.118851587            |

**Table S6 Distribution of extracted three mutational signatures across LUAD patients in the TCGA cohort**

| Sample ID       | Signature 1 | Signature 2 | Signature 4 |
|-----------------|-------------|-------------|-------------|
| TCGA-05-4244-01 | 0.35673218  | 0.057225228 | 0.586042591 |
| TCGA-05-4249-01 | 0.269369975 | 0.164087792 | 0.566542233 |
| TCGA-05-4250-01 | 0.275225944 | 0.249338962 | 0.475435094 |
| TCGA-05-4382-01 | 0.088317102 | 0.183834992 | 0.727847906 |
| TCGA-05-4384-01 | 0.398217733 | 0.121765467 | 0.480016801 |
| TCGA-05-4389-01 | 0.357738085 | 0.461844476 | 0.180417439 |
| TCGA-05-4390-01 | 0.219213224 | 0.013454307 | 0.767332469 |
| TCGA-05-4395-01 | 0.20118924  | 0.498044161 | 0.300766599 |
| TCGA-05-4396-01 | 0.315942358 | 0.100148932 | 0.583908709 |
| TCGA-05-4397-01 | 0.231926827 | 0.298518904 | 0.469554269 |
| TCGA-05-4398-01 | 0.263304385 | 0.201106683 | 0.535588932 |
| TCGA-05-4402-01 | 0.140849324 | 0.824251354 | 0.034899322 |
| TCGA-05-4403-01 | 0.593788908 | 0.076173738 | 0.330037354 |
| TCGA-05-4405-01 | 0.364065189 | 0.097781503 | 0.538153308 |
| TCGA-05-4410-01 | 0.142479689 | 0.227112182 | 0.63040813  |

|                 |             |             |             |
|-----------------|-------------|-------------|-------------|
| TCGA-05-4415-01 | 0.215320624 | 0.035022239 | 0.749657137 |
| TCGA-05-4417-01 | 0.254954878 | 0.025268091 | 0.719777032 |
| TCGA-05-4418-01 | 0.379648389 | 0.09868771  | 0.521663901 |
| TCGA-05-4420-01 | 0.310195528 | 0.080119494 | 0.609684979 |
| TCGA-05-4422-01 | 0.217482086 | 0.63453363  | 0.147984284 |
| TCGA-05-4424-01 | 0.164171656 | 0.265359636 | 0.570468708 |
| TCGA-05-4425-01 | 0.880640936 | 0.08928065  | 0.030078414 |
| TCGA-05-4426-01 | 0.777152391 | 0.12905912  | 0.093788489 |
| TCGA-05-4427-01 | 0.260225485 | 0.105859108 | 0.633915406 |
| TCGA-05-4430-01 | 0.201027407 | 0.100305503 | 0.69866709  |
| TCGA-05-4432-01 | 0.30343283  | 0.073863194 | 0.622703976 |
| TCGA-05-4433-01 | 0.924491084 | 0.075508916 | 3.03E-14    |
| TCGA-05-4434-01 | 0.720188232 | 0.279811768 | 2.18E-14    |
| TCGA-05-5420-01 | 0.558207531 | 0.075279186 | 0.366513283 |
| TCGA-05-5423-01 | 0.383921394 | 0.151278888 | 0.464799718 |
| TCGA-05-5425-01 | 0.250046494 | 0.103747917 | 0.64620559  |
| TCGA-05-5428-01 | 0.093099029 | 0.503962789 | 0.402938181 |
| TCGA-05-5429-01 | 0.854145614 | 0.145854386 | 2.75E-14    |
| TCGA-05-5715-01 | 0.167837262 | 0.787504837 | 0.0446579   |
| TCGA-35-3615-01 | 0.193840089 | 0.550091316 | 0.256068596 |
| TCGA-35-4122-01 | 0.478093395 | 0.19305879  | 0.328847815 |
| TCGA-35-4123-01 | 0.253151319 | 0.063756623 | 0.683092058 |
| TCGA-35-5375-01 | 0.398066591 | 0.148855222 | 0.453078187 |
| TCGA-38-4625-01 | 0.083414978 | 0.324375492 | 0.592209531 |
| TCGA-38-4626-01 | 0.109743669 | 0.090352083 | 0.799904248 |
| TCGA-38-4627-01 | 0.726575089 | 0.130156499 | 0.143268412 |
| TCGA-38-4628-01 | 0.564808756 | 0.204100624 | 0.23109062  |
| TCGA-38-4629-01 | 0.355381383 | 0.225814506 | 0.418804111 |
| TCGA-38-4630-01 | 0.340288973 | 0.574841504 | 0.084869524 |
| TCGA-38-4631-01 | 0.151766907 | 0.02819983  | 0.820033262 |
| TCGA-38-4632-01 | 0.283473658 | 0.105688454 | 0.610837888 |
| TCGA-38-6178-01 | 0.504525223 | 0.265243672 | 0.230231105 |
| TCGA-38-7271-01 | 0.055622417 | 0.590426351 | 0.353951232 |
| TCGA-38-A44F-01 | 0.892898465 | 0.065910882 | 0.041190653 |
| TCGA-44-2655-01 | 0.16753499  | 0.076925163 | 0.755539846 |
| TCGA-44-2656-01 | 0.202317599 | 0.019869752 | 0.777812648 |
| TCGA-44-2657-01 | 0.217656068 | 0.176660476 | 0.605683456 |
| TCGA-44-2659-01 | 0.20285282  | 0.044959234 | 0.752187946 |
| TCGA-44-2661-01 | 0.727783442 | 0.200092928 | 0.072123631 |
| TCGA-44-2662-01 | 0.082200128 | 0.810419419 | 0.107380454 |
| TCGA-44-2665-01 | 0.66938546  | 0.313474897 | 0.017139644 |
| TCGA-44-2666-01 | 0.804810362 | 0.195189638 | 5.16E-14    |
| TCGA-44-2668-01 | 0.079130318 | 0.299283035 | 0.621586648 |
| TCGA-44-3396-01 | 0.256460132 | 0.565614    | 0.177925868 |

|                 |             |             |             |
|-----------------|-------------|-------------|-------------|
| TCGA-44-3398-01 | 0.254537469 | 0.415431303 | 0.330031228 |
| TCGA-44-3917-01 | 0.218709988 | 0.204820129 | 0.576469883 |
| TCGA-44-3918-01 | 0.103451311 | 0.145809986 | 0.750738703 |
| TCGA-44-3919-01 | 0.39152819  | 0.532767193 | 0.075704618 |
| TCGA-44-4112-01 | 0.141475035 | 0.329785434 | 0.528739531 |
| TCGA-44-5643-01 | 0.427831743 | 0.326981173 | 0.245187084 |
| TCGA-44-5644-01 | 0.207277617 | 0.087838609 | 0.704883773 |
| TCGA-44-5645-01 | 0.984094362 | 2.85E-14    | 0.015905638 |
| TCGA-44-6144-01 | 0.339539096 | 0.130709866 | 0.529751038 |
| TCGA-44-6145-01 | 0.158995682 | 0.035582064 | 0.805422254 |
| TCGA-44-6146-01 | 0.891317574 | 0.037125268 | 0.071557158 |
| TCGA-44-6147-01 | 0.299081087 | 0.091966878 | 0.608952035 |
| TCGA-44-6148-01 | 0.764432062 | 1.85E-13    | 0.235567938 |
| TCGA-44-6774-01 | 0.158556744 | 5.47E-12    | 0.841443256 |
| TCGA-44-6775-01 | 0.576965414 | 0.215826399 | 0.207208187 |
| TCGA-44-6776-01 | 0.296455368 | 0.068051653 | 0.635492979 |
| TCGA-44-6777-01 | 0.202423923 | 0.386916045 | 0.410660031 |
| TCGA-44-6778-01 | 0.278301966 | 0.043993835 | 0.677704199 |
| TCGA-44-6779-01 | 0.540755255 | 0.133069246 | 0.326175499 |
| TCGA-44-7659-01 | 0.347881686 | 0.118673631 | 0.533444683 |
| TCGA-44-7660-01 | 0.455383769 | 0.1430991   | 0.401517131 |
| TCGA-44-7661-01 | 0.12909303  | 0.38175509  | 0.489151879 |
| TCGA-44-7662-01 | 0.200292319 | 0.217282174 | 0.582425508 |
| TCGA-44-7667-01 | 0.334305284 | 0.046550601 | 0.619144115 |
| TCGA-44-7669-01 | 0.331543019 | 0.029746455 | 0.638710526 |
| TCGA-44-7670-01 | 0.149432611 | 0.256294357 | 0.594273031 |
| TCGA-44-7671-01 | 0.314535124 | 0.110009545 | 0.575455331 |
| TCGA-44-7672-01 | 0.219609149 | 0.131904573 | 0.648486278 |
| TCGA-44-8117-01 | 0.204037729 | 0.062416959 | 0.733545312 |
| TCGA-44-8119-01 | 0.350149511 | 0.032781115 | 0.617069374 |
| TCGA-44-8120-01 | 0.162890599 | 0.064415447 | 0.772693954 |
| TCGA-44-A479-01 | 0.190949635 | 0.091644781 | 0.717405584 |
| TCGA-44-A47A-01 | 0.228848012 | 0.576920516 | 0.194231473 |
| TCGA-44-A47B-01 | 0.76058823  | 0.06514332  | 0.17426845  |
| TCGA-44-A47F-01 | 0.544852726 | 0.3040799   | 0.151067374 |
| TCGA-44-A47G-01 | 0.479744413 | 0.339278413 | 0.180977174 |
| TCGA-44-A4SS-01 | 0.264050054 | 0.219990286 | 0.515959661 |
| TCGA-44-A4SU-01 | 0.500943888 | 0.062076234 | 0.436979878 |
| TCGA-49-4486-01 | 0.126024674 | 0.787290622 | 0.086684703 |
| TCGA-49-4487-01 | 0.193707824 | 0.275607564 | 0.530684613 |
| TCGA-49-4488-01 | 0.21945883  | 0.145296428 | 0.635244742 |
| TCGA-49-4490-01 | 0.640051898 | 0.359948102 | 1.72E-14    |
| TCGA-49-4494-01 | 0.296125202 | 0.101946717 | 0.601928081 |
| TCGA-49-4501-01 | 0.738078923 | 0.236888397 | 0.02503268  |



|                 |             |             |             |
|-----------------|-------------|-------------|-------------|
| TCGA-49-4505-01 | 0.380114965 | 0.118940164 | 0.500944871 |
| TCGA-49-4506-01 | 0.492532268 | 0.035698713 | 0.471769019 |
| TCGA-49-4507-01 | 0.330961237 | 0.341061933 | 0.32797683  |
| TCGA-49-4510-01 | 0.605183537 | 0.123186539 | 0.271629924 |
| TCGA-49-4512-01 | 0.703703198 | 0.156018957 | 0.140277845 |
| TCGA-49-4514-01 | 0.125353852 | 0.530013481 | 0.344632667 |
| TCGA-49-6742-01 | 0.256176397 | 0.669170893 | 0.074652709 |
| TCGA-49-6743-01 | 0.214395167 | 0.411555146 | 0.374049687 |
| TCGA-49-6744-01 | 0.176821663 | 0.054378001 | 0.768800337 |
| TCGA-49-6745-01 | 0.281212341 | 0.714168465 | 0.004619194 |
| TCGA-49-6761-01 | 0.266686784 | 0.513563234 | 0.219749983 |
| TCGA-49-6767-01 | 0.218945124 | 0.118596002 | 0.662458875 |
| TCGA-49-AAQV-01 | 0.310524248 | 0.630327991 | 0.059147761 |
| TCGA-49-AAR0-01 | 0.391284693 | 0.203634057 | 0.40508125  |
| TCGA-49-AAR2-01 | 0.174519904 | 0.033054969 | 0.792425126 |
| TCGA-49-AAR3-01 | 0.456426158 | 0.132671668 | 0.410902174 |
| TCGA-49-AAR4-01 | 0.056043766 | 0.347288653 | 0.596667582 |
| TCGA-49-AAR9-01 | 0.186126352 | 0.028562244 | 0.785311404 |
| TCGA-49-AARE-01 | 0.155477579 | 0.116095798 | 0.728426623 |
| TCGA-49-AARN-01 | 0.574146888 | 0.193202821 | 0.232650291 |
| TCGA-49-AARO-01 | 0.033826627 | 0.078527725 | 0.887645648 |
| TCGA-49-AARQ-01 | 0.110490494 | 0.225351255 | 0.664158252 |
| TCGA-49-AARR-01 | 0.788525657 | 4.85E-13    | 0.211474343 |
| TCGA-4B-A93V-01 | 0.342262423 | 0.101076652 | 0.556660925 |
| TCGA-50-5044-01 | 0.088847356 | 0.890374629 | 0.020778015 |
| TCGA-50-5045-01 | 0.037430786 | 0.093030512 | 0.869538702 |
| TCGA-50-5049-01 | 0.106939158 | 0.056099262 | 0.83696158  |
| TCGA-50-5051-01 | 0.419573504 | 0.091288186 | 0.489138309 |
| TCGA-50-5055-01 | 0.741234043 | 0.258765957 | 5.4E-14     |
| TCGA-50-5066-01 | 0.246814197 | 0.142483566 | 0.610702237 |
| TCGA-50-5068-01 | 0.59872189  | 0.094476655 | 0.306801456 |
| TCGA-50-5072-01 | 0.310059696 | 0.199738322 | 0.490201982 |
| TCGA-50-5930-01 | 0.124750817 | 0.0000133   | 0.875235866 |
| TCGA-50-5931-01 | 0.296395327 | 0.109125311 | 0.594479362 |
| TCGA-50-5932-01 | 0.143415078 | 0.027010878 | 0.829574044 |
| TCGA-50-5933-01 | 0.282583811 | 0.143966218 | 0.573449971 |
| TCGA-50-5935-01 | 0.387700358 | 0.612299642 | 9.78E-15    |
| TCGA-50-5936-01 | 0.238824827 | 0.581332773 | 0.1798424   |
| TCGA-50-5939-01 | 0.55185563  | 0.34367464  | 0.10446973  |
| TCGA-50-5941-01 | 0.260326889 | 0.147701469 | 0.591971642 |
| TCGA-50-5942-01 | 0.632496462 | 0.024539873 | 0.342963666 |
| TCGA-50-5944-01 | 0.6730909   | 0.187522619 | 0.139386481 |
| TCGA-50-5946-01 | 0.211935561 | 0.330312398 | 0.45775204  |
| TCGA-50-6590-01 | 0.098252286 | 0.363177032 | 0.538570682 |

|                 |             |             |             |
|-----------------|-------------|-------------|-------------|
| TCGA-50-6591-01 | 0.772696209 | 0.167609777 | 0.059694014 |
| TCGA-50-6592-01 | 0.307514677 | 0.342398305 | 0.350087017 |
| TCGA-50-6593-01 | 0.335890935 | 0.068011015 | 0.59609805  |
| TCGA-50-6594-01 | 0.138789433 | 0.1655923   | 0.695618267 |
| TCGA-50-6595-01 | 0.358129734 | 0.46116809  | 0.180702176 |
| TCGA-50-6597-01 | 0.53191991  | 0.45133016  | 0.01674993  |
| TCGA-50-6673-01 | 0.823178681 | 0.153287468 | 0.023533851 |
| TCGA-50-7109-01 | 0.36292667  | 0.05053994  | 0.58653339  |
| TCGA-50-8457-01 | 0.504937516 | 0.174811167 | 0.320251318 |
| TCGA-50-8459-01 | 0.418980312 | 0.054144005 | 0.526875683 |
| TCGA-50-8460-01 | 0.674488124 | 0.257908861 | 0.067603015 |
| TCGA-53-7624-01 | 0.151406823 | 0.318972645 | 0.529620532 |
| TCGA-53-7626-01 | 0.129842616 | 0.181875339 | 0.688282045 |
| TCGA-53-7813-01 | 0.359176726 | 1.02E-14    | 0.640823274 |
| TCGA-53-A4EZ-01 | 0.200966731 | 0.084528243 | 0.714505025 |
| TCGA-55-1592-01 | 0.414445376 | 0.186821172 | 0.398733452 |
| TCGA-55-1594-01 | 0.305204689 | 0.509878511 | 0.1849168   |
| TCGA-55-1595-01 | 0.26064519  | 0.059236183 | 0.680118627 |
| TCGA-55-1596-01 | 0.51638478  | 0.064534554 | 0.419080667 |
| TCGA-55-5899-01 | 0.140261018 | 0.381291524 | 0.478447458 |
| TCGA-55-6543-01 | 0.843662111 | 0.156337889 | 4.83E-14    |
| TCGA-55-6642-01 | 0.2955079   | 0.072844815 | 0.631647285 |
| TCGA-55-6712-01 | 0.19427866  | 0.712215645 | 0.093505695 |
| TCGA-55-6968-01 | 1.84E-15    | 0.872781329 | 0.127218671 |
| TCGA-55-6969-01 | 0.282580227 | 0.06809484  | 0.649324933 |
| TCGA-55-6970-01 | 0.27043897  | 0.094676574 | 0.634884456 |
| TCGA-55-6971-01 | 0.345094753 | 0.116318473 | 0.538586774 |
| TCGA-55-6972-01 | 0.115849591 | 0.652572485 | 0.231577924 |
| TCGA-55-6975-01 | 0.518531747 | 0.188953329 | 0.292514925 |
| TCGA-55-6978-01 | 1           | 3.53E-14    | 3.53E-14    |
| TCGA-55-6979-01 | 0.063342018 | 0.56984371  | 0.366814272 |
| TCGA-55-6980-01 | 1           | 7.73E-14    | 7.73E-14    |
| TCGA-55-6981-01 | 0.760360994 | 0.174946701 | 0.064692306 |
| TCGA-55-6982-01 | 0.057798645 | 0.90778301  | 0.034418345 |
| TCGA-55-6983-01 | 0.48340757  | 0.068166418 | 0.448426012 |
| TCGA-55-6984-01 | 0.730526445 | 0.031880776 | 0.237592779 |
| TCGA-55-6985-01 | 0.232338664 | 0.013611612 | 0.754049724 |
| TCGA-55-6986-01 | 0.919976367 | 0.070793645 | 0.009229988 |
| TCGA-55-6987-01 | 0.160396414 | 0.546795949 | 0.292807636 |
| TCGA-55-7227-01 | 0.399213631 | 0.091862607 | 0.508923763 |
| TCGA-55-7281-01 | 0.207048983 | 0.16046392  | 0.632487097 |
| TCGA-55-7283-01 | 0.409573371 | 0.350418921 | 0.240007708 |
| TCGA-55-7284-01 | 0.960134889 | 0.039865111 | 2.16E-14    |
| TCGA-55-7570-01 | 0.212246893 | 0.373101879 | 0.414651228 |

|                 |             |             |             |
|-----------------|-------------|-------------|-------------|
| TCGA-55-7573-01 | 0.423599715 | 0.250148795 | 0.32625149  |
| TCGA-55-7574-01 | 0.069418542 | 0.717125185 | 0.213456274 |
| TCGA-55-7576-01 | 0.393438223 | 0.090280877 | 0.516280901 |
| TCGA-55-7724-01 | 0.533214462 | 0.242031302 | 0.224754235 |
| TCGA-55-7725-01 | 0.33268842  | 0.017858309 | 0.649453271 |
| TCGA-55-7726-01 | 0.250002931 | 0.703402363 | 0.046594705 |
| TCGA-55-7727-01 | 0.17447211  | 0.559531983 | 0.265995907 |
| TCGA-55-7728-01 | 0.392362778 | 0.03370624  | 0.573930982 |
| TCGA-55-7815-01 | 0.378518708 | 0.082012527 | 0.539468765 |
| TCGA-55-7816-01 | 1           | 6.18E-13    | 6.18E-13    |
| TCGA-55-7903-01 | 0.474631139 | 0.230407608 | 0.294961252 |
| TCGA-55-7907-01 | 0.083535546 | 0.296737956 | 0.619726498 |
| TCGA-55-7910-01 | 0.263958382 | 0.039634    | 0.696407618 |
| TCGA-55-7911-01 | 0.299646976 | 0.143097128 | 0.557255896 |
| TCGA-55-7913-01 | 0.270010595 | 0.188018013 | 0.541971391 |
| TCGA-55-7914-01 | 0.426869942 | 0.191047603 | 0.382082455 |
| TCGA-55-7994-01 | 0.182627729 | 0.083977085 | 0.733395186 |
| TCGA-55-7995-01 | 0.203783236 | 0.259944973 | 0.536271791 |
| TCGA-55-8085-01 | 0.196214039 | 0.549437956 | 0.254348005 |
| TCGA-55-8087-01 | 0.681430392 | 0.282815611 | 0.035753996 |
| TCGA-55-8089-01 | 0.069248069 | 0.490622568 | 0.440129363 |
| TCGA-55-8090-01 | 0.488069238 | 0.054177357 | 0.457753406 |
| TCGA-55-8091-01 | 0.984935548 | 3.58E-14    | 0.015064452 |
| TCGA-55-8092-01 | 0.253449043 | 0.372600836 | 0.37395012  |
| TCGA-55-8094-01 | 0.288378599 | 0.056223242 | 0.655398159 |
| TCGA-55-8096-01 | 0.353162713 | 0.140762053 | 0.506075234 |
| TCGA-55-8097-01 | 0.570666853 | 0.141005622 | 0.288327526 |
| TCGA-55-8203-01 | 0.286283542 | 3.73E-15    | 0.713716458 |
| TCGA-55-8204-01 | 0.237760119 | 0.520795083 | 0.241444798 |
| TCGA-55-8205-01 | 0.124536095 | 0.515179595 | 0.36028431  |
| TCGA-55-8206-01 | 0.667740729 | 0.224947582 | 0.10731169  |
| TCGA-55-8207-01 | 0.324718254 | 0.070324434 | 0.604957311 |
| TCGA-55-8208-01 | 0.168045292 | 0.672233986 | 0.159720722 |
| TCGA-55-8299-01 | 0.22829643  | 0.101229677 | 0.670473893 |
| TCGA-55-8301-01 | 0.334088983 | 0.146301735 | 0.519609282 |
| TCGA-55-8302-01 | 0.173930726 | 0.047582078 | 0.778487196 |
| TCGA-55-8505-01 | 0.540037006 | 0.403217351 | 0.056745643 |
| TCGA-55-8506-01 | 0.585132091 | 7.9E-16     | 0.414867909 |
| TCGA-55-8507-01 | 0.195390828 | 0.050711753 | 0.753897419 |
| TCGA-55-8508-01 | 0.392005661 | 0.117104306 | 0.490890033 |
| TCGA-55-8510-01 | 0.138671165 | 0.171346589 | 0.689982247 |
| TCGA-55-8511-01 | 0.25343697  | 0.214395215 | 0.532167815 |
| TCGA-55-8512-01 | 0.454267106 | 0.151203861 | 0.394529034 |
| TCGA-55-8513-01 | 1           | 1.55E-13    | 1.55E-13    |

|                 |             |             |             |
|-----------------|-------------|-------------|-------------|
| TCGA-55-8514-01 | 0.326327872 | 0.032713408 | 0.64095872  |
| TCGA-55-8614-01 | 0.566088004 | 0.18788565  | 0.246026346 |
| TCGA-55-8615-01 | 0.51032268  | 0.0548995   | 0.43477782  |
| TCGA-55-8616-01 | 0.207279539 | 0.035543389 | 0.757177073 |
| TCGA-55-8619-01 | 0.886249903 | 0.063340437 | 0.05040966  |
| TCGA-55-8620-01 | 0.345609818 | 0.049660928 | 0.604729254 |
| TCGA-55-8621-01 | 0.436606412 | 0.1816498   | 0.381743787 |
| TCGA-55-A48X-01 | 0.108482718 | 0.142377328 | 0.749139954 |
| TCGA-55-A48Y-01 | 0.026026195 | 0.956676335 | 0.01729747  |
| TCGA-55-A48Z-01 | 0.69553369  | 0.112508869 | 0.191957442 |
| TCGA-55-A490-01 | 0.111450966 | 0.13510923  | 0.753439804 |
| TCGA-55-A491-01 | 0.274385122 | 0.139602706 | 0.586012172 |
| TCGA-55-A492-01 | 0.377128069 | 0.078446157 | 0.544425774 |
| TCGA-55-A493-01 | 0.195352414 | 0.41993998  | 0.384707606 |
| TCGA-55-A494-01 | 0.42432879  | 0.093454473 | 0.482216737 |
| TCGA-55-A4DF-01 | 0.054038823 | 0.85013579  | 0.095825387 |
| TCGA-55-A4DG-01 | 0.174624979 | 0.050140902 | 0.775234118 |
| TCGA-55-A57B-01 | 0.727470077 | 0.197596844 | 0.074933079 |
| TCGA-62-8394-01 | 0.451730556 | 0.424399744 | 0.1238697   |
| TCGA-62-8395-01 | 0.625610566 | 0.325585147 | 0.048804286 |
| TCGA-62-8397-01 | 0.803764209 | 0.046638174 | 0.149597618 |
| TCGA-62-8398-01 | 0.577248989 | 0.140611183 | 0.282139828 |
| TCGA-62-8399-01 | 0.160342078 | 0.560927582 | 0.27873034  |
| TCGA-62-8402-01 | 0.75132201  | 0.15623916  | 0.092438831 |
| TCGA-62-A46O-01 | 0.178424217 | 0.272014156 | 0.549561627 |
| TCGA-62-A46P-01 | 0.29705746  | 5.56E-15    | 0.70294254  |
| TCGA-62-A46R-01 | 0.450063811 | 0.222958508 | 0.326977682 |
| TCGA-62-A46S-01 | 0.508848863 | 0.137990007 | 0.35316113  |
| TCGA-62-A46U-01 | 0.6237271   | 0.206690501 | 0.169582399 |
| TCGA-62-A46V-01 | 0.84873014  | 0.078924961 | 0.072344899 |
| TCGA-62-A46Y-01 | 0.94162817  | 0.001624765 | 0.056747065 |
| TCGA-62-A470-01 | 0.611941227 | 0.097003476 | 0.291055297 |
| TCGA-62-A471-01 | 0.236785013 | 0.727717076 | 0.035497912 |
| TCGA-62-A472-01 | 0.714013984 | 0.044683536 | 0.24130248  |
| TCGA-64-1676-01 | 0.182228999 | 0.026716116 | 0.791054885 |
| TCGA-64-1679-01 | 0.110817277 | 0.158990885 | 0.730191838 |
| TCGA-64-1680-01 | 0.42091812  | 0.536495285 | 0.042586594 |
| TCGA-64-1681-01 | 0.547788979 | 0.404171255 | 0.048039766 |
| TCGA-64-5774-01 | 0.31899162  | 0.066906072 | 0.614102308 |
| TCGA-64-5775-01 | 0.217118467 | 0.05817202  | 0.724709513 |
| TCGA-64-5778-01 | 0.173412532 | 0.118212709 | 0.708374758 |
| TCGA-64-5779-01 | 0.29137695  | 0.041393905 | 0.667229145 |
| TCGA-64-5781-01 | 0.110713852 | 0.222438234 | 0.666847913 |
| TCGA-64-5815-01 | 0.327483067 | 0.024906412 | 0.647610521 |

|                 |             |             |             |
|-----------------|-------------|-------------|-------------|
| TCGA-67-3770-01 | 0.352362827 | 0.025228166 | 0.622409007 |
| TCGA-67-3771-01 | 0.172383764 | 0.476355366 | 0.35126087  |
| TCGA-67-3773-01 | 0.524079209 | 0.004231604 | 0.471689187 |
| TCGA-67-3774-01 | 0.328003545 | 0.114842023 | 0.557154432 |
| TCGA-67-4679-01 | 0.225686381 | 0.061457081 | 0.712856538 |
| TCGA-67-6215-01 | 0.968936727 | 0.031063273 | 8.98E-15    |
| TCGA-67-6216-01 | 0.451390064 | 0.505906209 | 0.042703727 |
| TCGA-67-6217-01 | 0.445158271 | 0.094444405 | 0.460397679 |
| TCGA-69-7760-01 | 0.694334877 | 0.15753254  | 0.148132583 |
| TCGA-69-7761-01 | 0.709910448 | 0.018643638 | 0.271445914 |
| TCGA-69-7763-01 | 0.728344768 | 0.022776823 | 0.248878409 |
| TCGA-69-7764-01 | 0.606693224 | 0.095646914 | 0.297659862 |
| TCGA-69-7765-01 | 0.089592261 | 0.201411815 | 0.708995924 |
| TCGA-69-7973-01 | 0.232379257 | 0.066089677 | 0.701531066 |
| TCGA-69-7974-01 | 0.243359364 | 0.103343834 | 0.653296802 |
| TCGA-69-7978-01 | 0.114170683 | 0.46725768  | 0.418571637 |
| TCGA-69-7979-01 | 0.106931876 | 0.098327701 | 0.794740422 |
| TCGA-69-7980-01 | 0.142299351 | 0.367107189 | 0.49059346  |
| TCGA-69-8253-01 | 0.227506034 | 0.279515304 | 0.492978662 |
| TCGA-69-8254-01 | 0.745023371 | 0.009843659 | 0.24513297  |
| TCGA-69-8255-01 | 0.423463439 | 0.212577404 | 0.363959157 |
| TCGA-69-A59K-01 | 0.219974505 | 0.130991774 | 0.649033721 |
| TCGA-71-6725-01 | 0.82284323  | 0.142637824 | 0.034518946 |
| TCGA-71-8520-01 | 0.621602201 | 0.274512745 | 0.103885054 |
| TCGA-73-4658-01 | 0.144577106 | 0.57127443  | 0.284148464 |
| TCGA-73-4659-01 | 0.267962473 | 0.083230058 | 0.648807469 |
| TCGA-73-4662-01 | 0.34208075  | 0.11334882  | 0.54457043  |
| TCGA-73-4666-01 | 0.300991071 | 0.089238269 | 0.60977066  |
| TCGA-73-4668-01 | 0.207070384 | 0.025522345 | 0.767407272 |
| TCGA-73-4670-01 | 0.38499135  | 0.114580212 | 0.500428438 |
| TCGA-73-4675-01 | 0.69870276  | 0.102863667 | 0.198433573 |
| TCGA-73-4676-01 | 0.718266911 | 0.043836155 | 0.237896934 |
| TCGA-73-4677-01 | 0.340891009 | 0.091809543 | 0.567299448 |
| TCGA-73-7498-01 | 0.481627844 | 0.022618354 | 0.495753801 |
| TCGA-73-7499-01 | 0.547498243 | 0.385705599 | 0.066796158 |
| TCGA-73-A9RS-01 | 0.094416054 | 0.119162673 | 0.786421273 |
| TCGA-75-5122-01 | 0.436182274 | 0.315598104 | 0.248219622 |
| TCGA-75-5125-01 | 0.321950921 | 0.408262807 | 0.269786272 |
| TCGA-75-5126-01 | 0.106966987 | 0.452477868 | 0.440555145 |
| TCGA-75-5146-01 | 0.131278037 | 0.08615004  | 0.782571922 |
| TCGA-75-5147-01 | 0.640347272 | 0.31658191  | 0.043070818 |
| TCGA-75-6203-01 | 0.948768079 | 6.79E-14    | 0.051231921 |
| TCGA-75-6205-01 | 0.69677552  | 0.20930688  | 0.0939176   |
| TCGA-75-6206-01 | 0.273677093 | 0.310957012 | 0.415365894 |

|                 |             |             |             |
|-----------------|-------------|-------------|-------------|
| TCGA-75-6207-01 | 0.598385488 | 0.295464349 | 0.106150164 |
| TCGA-75-6211-01 | 0.260167398 | 0.079235782 | 0.66059682  |
| TCGA-75-6212-01 | 0.877724822 | 0.117158009 | 0.005117169 |
| TCGA-75-6214-01 | 0.130077794 | 0.416052719 | 0.453869487 |
| TCGA-75-7025-01 | 0.794107122 | 0.205892878 | 3.15E-14    |
| TCGA-75-7027-01 | 0.264640498 | 0.040063641 | 0.695295862 |
| TCGA-75-7030-01 | 0.908399279 | 7.4E-14     | 0.091600721 |
| TCGA-75-7031-01 | 0.453122464 | 0.181900546 | 0.36497699  |
| TCGA-78-7145-01 | 0.26481999  | 0.161235302 | 0.573944708 |
| TCGA-78-7146-01 | 0.193218055 | 0.450886022 | 0.355895923 |
| TCGA-78-7147-01 | 0.361669331 | 0.229892756 | 0.408437914 |
| TCGA-78-7148-01 | 0.434160119 | 0.060538103 | 0.505301778 |
| TCGA-78-7149-01 | 0.189478169 | 0.682012881 | 0.12850895  |
| TCGA-78-7150-01 | 0.244309009 | 0.515187078 | 0.240503913 |
| TCGA-78-7152-01 | 0.1322136   | 0.643265559 | 0.224520841 |
| TCGA-78-7153-01 | 0.564507578 | 0.295159436 | 0.140332987 |
| TCGA-78-7154-01 | 0.366293765 | 0.523736422 | 0.109969813 |
| TCGA-78-7155-01 | 0.145197765 | 0.135436912 | 0.719365322 |
| TCGA-78-7156-01 | 0.099448081 | 0.640005187 | 0.260546731 |
| TCGA-78-7158-01 | 0.233797336 | 0.297643691 | 0.468558973 |
| TCGA-78-7159-01 | 0.298431358 | 0.047083401 | 0.65448524  |
| TCGA-78-7160-01 | 0.674461856 | 0.174541951 | 0.150996193 |
| TCGA-78-7161-01 | 0.43110494  | 0.09717214  | 0.471722919 |
| TCGA-78-7162-01 | 0.39444397  | 0.33342286  | 0.27213317  |
| TCGA-78-7163-01 | 0.819603342 | 0.085335184 | 0.095061475 |
| TCGA-78-7166-01 | 0.256036031 | 0.054358427 | 0.689605542 |
| TCGA-78-7167-01 | 0.34401911  | 0.415808257 | 0.240172633 |
| TCGA-78-7220-01 | 0.162674857 | 0.247081157 | 0.590243986 |
| TCGA-78-7535-01 | 0.488770555 | 0.056420672 | 0.454808773 |
| TCGA-78-7536-01 | 0.318090219 | 0.01882974  | 0.663080042 |
| TCGA-78-7537-01 | 0.209231987 | 0.211441137 | 0.579326876 |
| TCGA-78-7539-01 | 0.113974805 | 0.743759129 | 0.142266066 |
| TCGA-78-7540-01 | 0.894842507 | 0.105157493 | 4.84E-12    |
| TCGA-78-7542-01 | 0.234118527 | 0.167222518 | 0.598658955 |
| TCGA-78-7633-01 | 0.330439902 | 0.121636201 | 0.547923897 |
| TCGA-78-8640-01 | 0.275957709 | 0.270373934 | 0.453668357 |
| TCGA-78-8648-01 | 0.541554914 | 1.07E-13    | 0.458445086 |
| TCGA-78-8655-01 | 0.477420267 | 0.093948749 | 0.428630984 |
| TCGA-78-8660-01 | 0.322294517 | 0.285530946 | 0.392174538 |
| TCGA-78-8662-01 | 0.212488612 | 0.123201773 | 0.664309615 |
| TCGA-80-5607-01 | 0.087139355 | 0.898632005 | 0.01422864  |
| TCGA-80-5608-01 | 0.29324057  | 0.078781669 | 0.627977761 |
| TCGA-80-5611-01 | 0.547116908 | 0.106581419 | 0.346301673 |
| TCGA-83-5908-01 | 0.146279396 | 0.52000118  | 0.333719424 |

|                 |             |             |             |
|-----------------|-------------|-------------|-------------|
| TCGA-86-6562-01 | 0.407774735 | 0.511493178 | 0.080732087 |
| TCGA-86-6851-01 | 0.09812561  | 0.230098882 | 0.671775508 |
| TCGA-86-7701-01 | 0.446078682 | 0.027038741 | 0.526882577 |
| TCGA-86-7711-01 | 0.31321295  | 0.348384276 | 0.338402774 |
| TCGA-86-7713-01 | 0.371402239 | 0.086916057 | 0.541681705 |
| TCGA-86-7714-01 | 0.495110638 | 0.052889607 | 0.451999756 |
| TCGA-86-7953-01 | 0.612508588 | 0.160431415 | 0.227059996 |
| TCGA-86-7954-01 | 0.382272278 | 0.290293663 | 0.327434059 |
| TCGA-86-7955-01 | 0.321067957 | 0.165219459 | 0.513712584 |
| TCGA-86-8054-01 | 0.326159063 | 0.102778473 | 0.571062464 |
| TCGA-86-8055-01 | 0.835725303 | 0.079128318 | 0.085146379 |
| TCGA-86-8056-01 | 0.119119134 | 0.714144328 | 0.166736538 |
| TCGA-86-8073-01 | 0.106082734 | 0.104740006 | 0.78917726  |
| TCGA-86-8074-01 | 0.704668411 | 0.135087667 | 0.160243922 |
| TCGA-86-8075-01 | 0.847521613 | 0.135986703 | 0.016491684 |
| TCGA-86-8076-01 | 0.463492451 | 0.388467968 | 0.14803958  |
| TCGA-86-8278-01 | 0.170548925 | 0.829451075 | 7.51E-15    |
| TCGA-86-8279-01 | 0.249237216 | 0.0363021   | 0.714460684 |
| TCGA-86-8280-01 | 0.760512209 | 0.116021143 | 0.123466649 |
| TCGA-86-8281-01 | 0.309837596 | 0.210963576 | 0.479198827 |
| TCGA-86-8358-01 | 0.241159808 | 0.040555615 | 0.718284577 |
| TCGA-86-8359-01 | 0.311275972 | 0.111388324 | 0.577335704 |
| TCGA-86-8585-01 | 0.151633393 | 0.33008538  | 0.518281227 |
| TCGA-86-8668-01 | 0.875615501 | 0.100957269 | 0.02342723  |
| TCGA-86-8669-01 | 0.553932128 | 0.099457568 | 0.346610304 |
| TCGA-86-8671-01 | 0.62023003  | 0.37976997  | 2.48E-14    |
| TCGA-86-8672-01 | 0.254183489 | 0.260306979 | 0.485509532 |
| TCGA-86-8673-01 | 0.204255445 | 0.156048896 | 0.639695659 |
| TCGA-86-8674-01 | 0.138266824 | 0.204181646 | 0.65755153  |
| TCGA-86-A456-01 | 0.18097347  | 0.165471499 | 0.653555031 |
| TCGA-86-A4JF-01 | 0.750453128 | 0.126407698 | 0.123139174 |
| TCGA-86-A4P7-01 | 0.41497129  | 0.516947972 | 0.068080738 |
| TCGA-86-A4P8-01 | 1.14E-12    | 1.14E-12    | 1           |
| TCGA-91-6828-01 | 0.276238631 | 0.159303339 | 0.56445803  |
| TCGA-91-6829-01 | 0.293350486 | 0.125604539 | 0.581044975 |
| TCGA-91-6830-01 | 0.028019336 | 0.932137604 | 0.039843059 |
| TCGA-91-6831-01 | 0.441570896 | 0.080081996 | 0.478347108 |
| TCGA-91-6835-01 | 0.520377625 | 0.232539848 | 0.247082527 |
| TCGA-91-6836-01 | 0.221511187 | 0.09033512  | 0.688153693 |
| TCGA-91-6840-01 | 0.197585597 | 0.769481582 | 0.03293282  |
| TCGA-91-6847-01 | 0.721674606 | 0.213791724 | 0.06453367  |
| TCGA-91-6848-01 | 0.253009971 | 0.250407302 | 0.496582727 |
| TCGA-91-6849-01 | 0.239307578 | 0.155380994 | 0.605311428 |
| TCGA-91-7771-01 | 0.405414179 | 0.216593716 | 0.377992105 |

|                 |             |             |             |
|-----------------|-------------|-------------|-------------|
| TCGA-91-8496-01 | 0.80349015  | 0.155568076 | 0.040941774 |
| TCGA-91-8497-01 | 0.6984019   | 0.139699057 | 0.161899043 |
| TCGA-91-8499-01 | 0.25907871  | 0.430374086 | 0.310547205 |
| TCGA-91-A4BC-01 | 0.219616146 | 0.071714591 | 0.708669264 |
| TCGA-91-A4BD-01 | 0.909360916 | 0.090639084 | 4.52E-14    |
| TCGA-93-7347-01 | 0.297777825 | 0.148798535 | 0.55342364  |
| TCGA-93-7348-01 | 0.499245375 | 0.204457838 | 0.296296787 |
| TCGA-93-8067-01 | 6.26E-08    | 0.944493178 | 0.055506759 |
| TCGA-93-A4JN-01 | 0.625551674 | 0.234828598 | 0.139619728 |
| TCGA-93-A4JO-01 | 0.539438184 | 0.367525674 | 0.093036141 |
| TCGA-93-A4JP-01 | 0.366809947 | 0.489474962 | 0.143715092 |
| TCGA-93-A4JQ-01 | 0.442023293 | 0.526814993 | 0.031161714 |
| TCGA-95-7039-01 | 0.20828551  | 0.089035502 | 0.702678988 |
| TCGA-95-7043-01 | 0.143955512 | 0.089442128 | 0.76660236  |
| TCGA-95-7562-01 | 0.180349381 | 4.87E-11    | 0.819650619 |
| TCGA-95-7567-01 | 0.757216412 | 0.016195894 | 0.226587694 |
| TCGA-95-7944-01 | 3.51E-15    | 0.976723622 | 0.023276378 |
| TCGA-95-7947-01 | 0.160575366 | 0.583077766 | 0.256346867 |
| TCGA-95-7948-01 | 0.027619032 | 0.972380968 | 5.76E-15    |
| TCGA-95-8039-01 | 0.565006134 | 0.25956169  | 0.175432176 |
| TCGA-95-8494-01 | 0.285304834 | 0.683166598 | 0.031528568 |
| TCGA-95-A4VK-01 | 0.343751267 | 0.031036705 | 0.625212028 |
| TCGA-95-A4VN-01 | 0.117320669 | 0.145438179 | 0.737241152 |
| TCGA-95-A4VP-01 | 0.391303963 | 0.04120385  | 0.567492187 |
| TCGA-97-7546-01 | 0.23586252  | 0.072161393 | 0.691976087 |
| TCGA-97-7547-01 | 0.209534816 | 0.448440573 | 0.342024611 |
| TCGA-97-7552-01 | 0.931213392 | 2.78E-14    | 0.068786608 |
| TCGA-97-7553-01 | 0.685932851 | 0.070619769 | 0.24344738  |
| TCGA-97-7554-01 | 0.278156055 | 0.063522207 | 0.658321738 |
| TCGA-97-7937-01 | 0.260113626 | 0.094958838 | 0.644927536 |
| TCGA-97-7938-01 | 0.193886872 | 0.197823453 | 0.608289675 |
| TCGA-97-7941-01 | 0.330619387 | 0.26357291  | 0.405807702 |
| TCGA-97-8171-01 | 0.845962166 | 0.037207924 | 0.11682991  |
| TCGA-97-8172-01 | 0.450614279 | 5.45E-15    | 0.549385721 |
| TCGA-97-8174-01 | 0.370763523 | 0.232284142 | 0.396952335 |
| TCGA-97-8175-01 | 0.650240801 | 0.121974711 | 0.227784488 |
| TCGA-97-8176-01 | 0.32563375  | 0.442109232 | 0.232257018 |
| TCGA-97-8177-01 | 0.703325979 | 0.199518465 | 0.097155557 |
| TCGA-97-8179-01 | 0.184557754 | 0.105918141 | 0.709524106 |
| TCGA-97-8547-01 | 0.563259643 | 0.383668247 | 0.05307211  |
| TCGA-97-8552-01 | 0.72126998  | 0.128260369 | 0.150469651 |
| TCGA-97-A4LX-01 | 0.256791087 | 0.040583166 | 0.702625747 |
| TCGA-97-A4M0-01 | 0.173041902 | 0.268139401 | 0.558818697 |
| TCGA-97-A4M1-01 | 0.546507737 | 0.338637215 | 0.114855048 |



|                 |             |             |             |
|-----------------|-------------|-------------|-------------|
| TCGA-97-A4M2-01 | 0.341845213 | 0.452915359 | 0.205239427 |
| TCGA-97-A4M3-01 | 0.224476179 | 0.221768234 | 0.553755587 |
| TCGA-97-A4M5-01 | 0.05374447  | 0.909882391 | 0.03637314  |
| TCGA-97-A4M6-01 | 0.819121866 | 0.180878118 | 1.57E-08    |
| TCGA-97-A4M7-01 | 0.225622943 | 0.051504835 | 0.722872223 |
| TCGA-99-7458-01 | 0.233041276 | 0.052587414 | 0.71437131  |
| TCGA-99-8025-01 | 0.238338979 | 0.429022916 | 0.332638105 |
| TCGA-99-8028-01 | 0.148555953 | 8.29E-13    | 0.851444047 |
| TCGA-99-8032-01 | 0.263622856 | 0.109744643 | 0.626632502 |
| TCGA-99-8033-01 | 0.401261966 | 0.099500804 | 0.499237229 |
| TCGA-99-AA5R-01 | 0.17064571  | 0.013978901 | 0.815375389 |
| TCGA-J2-8192-01 | 0.740241287 | 0.189684029 | 0.070074685 |
| TCGA-J2-8194-01 | 0.555399974 | 0.070265294 | 0.374334733 |
| TCGA-J2-A4AD-01 | 0.241779963 | 0.572530732 | 0.185689305 |
| TCGA-J2-A4AE-01 | 0.630195623 | 0.327963407 | 0.041840969 |
| TCGA-J2-A4AG-01 | 0.501772492 | 0.094809185 | 0.403418322 |
| TCGA-L4-A4E5-01 | 0.227393923 | 0.047192546 | 0.725413531 |
| TCGA-L4-A4E6-01 | 0.061556653 | 0.570131784 | 0.368311563 |
| TCGA-L9-A443-01 | 0.272995189 | 0.076525857 | 0.650478954 |
| TCGA-L9-A444-01 | 0.15849694  | 0.045527133 | 0.795975927 |
| TCGA-L9-A50W-01 | 0.596782925 | 0.276150647 | 0.127066429 |
| TCGA-L9-A5IP-01 | 0.158013127 | 0.107824412 | 0.734162462 |
| TCGA-L9-A743-01 | 0.152583785 | 0.552641574 | 0.294774642 |
| TCGA-L9-A7SV-01 | 0.092712239 | 0.017194638 | 0.890093123 |
| TCGA-L9-A8F4-01 | 0.188703317 | 0.134183411 | 0.677113272 |
| TCGA-MN-A4N1-01 | 0.301414829 | 0.098123852 | 0.600461319 |
| TCGA-MN-A4N4-01 | 0.071139608 | 0.402219509 | 0.526640884 |
| TCGA-MN-A4N5-01 | 0.231136949 | 0.147082512 | 0.621780539 |
| TCGA-MP-A4SV-01 | 0.201955726 | 0.499658677 | 0.298385597 |
| TCGA-MP-A4SW-01 | 0.67421915  | 0.247866642 | 0.077914207 |
| TCGA-MP-A4SY-01 | 0.427595773 | 0.249350091 | 0.323054136 |
| TCGA-MP-A4T2-01 | 0.449980468 | 0.397750548 | 0.152268984 |
| TCGA-MP-A4T4-01 | 0.187463787 | 0.135166403 | 0.67736981  |
| TCGA-MP-A4T6-01 | 0.626257755 | 0.354695469 | 0.019046777 |
| TCGA-MP-A4T7-01 | 0.316322333 | 0.040605242 | 0.643072425 |
| TCGA-MP-A4T8-01 | 0.486265295 | 0.094659438 | 0.419075268 |
| TCGA-MP-A4T9-01 | 0.275665326 | 0.416462768 | 0.307871906 |
| TCGA-MP-A4TA-01 | 0.349034807 | 0.118388564 | 0.532576629 |
| TCGA-MP-A4TC-01 | 0.173059223 | 0.153509262 | 0.673431515 |
| TCGA-MP-A4TD-01 | 0.535242496 | 0.05875492  | 0.406002584 |
| TCGA-MP-A4TE-01 | 0.649411668 | 9.24E-15    | 0.350588332 |
| TCGA-MP-A4TF-01 | 0.25598275  | 0.078978161 | 0.665039089 |
| TCGA-MP-A4TH-01 | 0.622273163 | 1.17E-14    | 0.377726837 |
| TCGA-MP-A4TI-01 | 0.104400605 | 0.745503537 | 0.150095857 |

|                 |             |             |             |
|-----------------|-------------|-------------|-------------|
| TCGA-MP-A4TJ-01 | 0.642685177 | 0.021294719 | 0.336020104 |
| TCGA-MP-A4TK-01 | 0.126218978 | 0.28583048  | 0.587950542 |
| TCGA-MP-A5C7-01 | 0.711255314 | 0.037903489 | 0.250841197 |
| TCGA-NJ-A4YF-01 | 0.133485631 | 0.050438104 | 0.816076266 |
| TCGA-NJ-A4YG-01 | 0.363929958 | 0.377457626 | 0.258612416 |
| TCGA-NJ-A4YI-01 | 0.260309796 | 0.084642284 | 0.65504792  |
| TCGA-NJ-A4YP-01 | 1.76E-15    | 0.861294378 | 0.138705622 |
| TCGA-NJ-A4YQ-01 | 0.161645307 | 0.012629638 | 0.825725056 |
| TCGA-NJ-A55A-01 | 0.287554526 | 0.084946393 | 0.627499081 |
| TCGA-NJ-A55O-01 | 0.167327316 | 0.102205989 | 0.730466695 |
| TCGA-NJ-A55R-01 | 0.262660283 | 0.080798659 | 0.656541059 |
| TCGA-NJ-A7XG-01 | 0.775441804 | 0.035179402 | 0.189378794 |
| TCGA-O1-A52J-01 | 0.336096993 | 0.086331795 | 0.577571212 |
| TCGA-S2-AA1A-01 | 0.271801901 | 0.031491905 | 0.696706195 |

---
